# Supplementary material for: Genomic Surveillance of Circulating SARS-CoV-2 in South East Italy: A One-Year Retrospective Genetic Study
Source: MDPI journal article supplement (doi:10.3390/v13050731), 2021-04-22
Supplement: s1 [file s1]

**Supplementary Materials:** The following are available online at [www.mdpi.com/xxx](http://www.mdpi.com/xxx), **Table S1:** Data of 298 human SARS-CoV-2 genomes collected from Apulia and Basilicata, sequenced in this study and submitted to GISAID (Accession ID); **Table S2:** Quality (raw sequencing) data for the 144 SARS-CoV-2 genomes sequenced in this study; **Table S3:** Pangolin lineage prediction for the 353 SARS-CoV-2 genomic sequences from Apulia and Basilicata, surveyed in this study. The percentages refer to the frequency compared to the total number of genomes assigned to the same clade; **Table S4:** Nextclade prediction for the 2244 Italian sequences of the SARS-CoV-2 genome and the 353 sequences from Apulia and Basilicata, with the corresponding incidence rates.

| Virus name                         | Accession ID   | Collection date | Location                                                  | Lineage    |
|------------------------------------|----------------|-----------------|-----------------------------------------------------------|------------|
| hCoV-19/Italy/APU-IZSPB-59PT/2020  | EPI_ISL_876811 | 21/04/2020      | Europe / Italy / Apulia / Bari / Adelfia                  | B.1.1.74   |
| hCoV-19/Italy/APU-IZSPB-60PT/2020  | EPI_ISL_876812 | 21/04/2020      | Europe / Italy / Apulia / Bari / Bitetto                  | B.1.1.74   |
| hCoV-19/Italy/APU-IZSPB-67PT/2020  | EPI_ISL_876739 | 11/04/2020      | Europe / Italy / Apulia / Brindisi                        | B.1.1.265  |
| hCoV-19/Italy/APU-IZSPB-74PT/2020  | EPI_ISL_876813 | 11/04/2020      | Europe / Italy / Apulia / Brindisi                        | B.1.1.74   |
| hCoV-19/Italy/APU-IZSPB-150PT/2020 | EPI_ISL_722899 | 2020            | Europe / Italy / Apulia / Lecce / Copertino               | B.1.1.33   |
| hCoV-19/Italy/APU-IZSPB-158PT/2020 | EPI_ISL_722872 | 18/07/2020      | Europe / Italy / Apulia / Brindisi / Fasano               | B.1.1.305  |
| hCoV-19/Italy/APU-IZSPB-171PT/2020 | EPI_ISL_653823 | 17/08/2020      | Europe / Italy / Apulia / Foggia / Manfredonia            | B.1.1.293  |
| hCoV-19/Italy/APU-IZSPB-178PT/2020 | EPI_ISL_722859 | 28/08/2020      | Europe / Italy / Apulia / Bari                            | B.1.1.229  |
| hCoV-19/Italy/APU-IZSPB-180PT/2020 | EPI_ISL_722898 | 28/08/2020      | Europe / Italy / Apulia / Bari                            | B.1.1.229  |
| hCoV-19/Italy/APU-IZSPB-181PT/2020 | EPI_ISL_722860 | 28/08/2020      | Europe / Italy / Apulia / Bari                            | B.1.1.229  |
| hCoV-19/Italy/APU-IZSPB-182PT/2020 | EPI_ISL_649785 | 28/08/2020      | Europe / Italy / Apulia                                   | B.1.1.229  |
| hCoV-19/Italy/APU-IZSPB-183PT/2020 | EPI_ISL_722861 | 28/08/2020      | Europe / Italy / Apulia / Bari / Torre a Mare             | B.1.1.229  |
| hCoV-19/Italy/APU-IZSPB-190PT/2020 | EPI_ISL_722862 | 28/08/2020      | Europe / Italy / Apulia / Bari                            | B.1.1.229  |
| hCoV-19/Italy/APU-IZSPB-185PT/2020 | EPI_ISL_722863 | 28/08/2020      | Europe / Italy / Apulia / Bari                            | B.1.1.229  |
| hCoV-19/Italy/APU-IZSPB-186PT/2020 | EPI_ISL_722864 | 28/08/2020      | Europe / Italy / Apulia / Bari                            | B.1.1.288  |
| hCoV-19/Italy/APU-IZSPB-187PT/2020 | EPI_ISL_722895 | 28/08/2020      | Europe / Italy / Apulia / Bari                            | B.1.1.229  |
| hCoV-19/Italy/APU-IZSPB-188PT/2020 | EPI_ISL_722865 | 28/08/2020      | Europe / Italy / Apulia / Bari                            | B.1.1.229  |
| hCoV-19/Italy/APU-IZSPB-189PT/2020 | EPI_ISL_722866 | 28/08/2020      | Europe / Italy / Apulia / Bari                            | B.1.1.229  |
| hCoV-19/Italy/APU-IZSPB-190PT/2020 | EPI_ISL_649938 | 28/08/2020      | Europe / Italy / Apulia / Bari                            | B.1.1.229  |
| hCoV-19/Italy/APU-IZSPB-192PT/2020 | EPI_ISL_649939 | 28/08/2020      | Europe / Italy / Apulia / Bari                            | B.1.1.229  |
| hCoV-19/Italy/BAS-IZSPB-194PT/2020 | EPI_ISL_722892 | 24/08/2020      | Europe / Italy / Basilicata / Potenza                     | B.1        |
| hCoV-19/Italy/APU-IZSPB-195PT/2020 | EPI_ISL_722867 | 28/08/2020      | Europe / Italy / Apulia / Bari                            | B.1.1.229  |
| hCoV-19/Italy/APU-IZSPB-196PT/2020 | EPI_ISL_722900 | 28/08/2020      | Europe / Italy / Apulia / Bari                            | B.1.1.229  |
| hCoV-19/Italy/APU-IZSPB-197PT/2020 | EPI_ISL_722868 | 28/08/2020      | Europe / Italy / Apulia / Bari                            | B.1.1.229  |
| hCoV-19/Italy/APU-IZSPB-198PT/2020 | EPI_ISL_653763 | 28/08/2020      | Europe / Italy / Apulia / Bari                            | B.1.1.229  |
| hCoV-19/Italy/APU-IZSPB-200PT/2020 | EPI_ISL_653764 | 28/08/2020      | Europe / Italy / Apulia / Bari                            | B.1.1.229  |
| hCoV-19/Italy/APU-IZSPB-201PT/2020 | EPI_ISL_722869 | 28/08/2020      | Europe / Italy / Apulia / Bari                            | B.1.1.229  |
| hCoV-19/Italy/APU-IZSPB-202PT/2020 | EPI_ISL_722870 | 28/08/2020      | Europe / Italy / Apulia / Bari                            | B.1.1.229  |
| hCoV-19/Italy/APU-IZSPB-203PT/2020 | EPI_ISL_722871 | 28/08/2020      | Europe / Italy / Apulia / Bari                            | B.1.1.1    |
| hCoV-19/Italy/APU-IZSPB-265PT/2020 | EPI_ISL_653784 | 22/09/2020      | Europe / Italy / Apulia / Bari                            | B.1.1.277  |
| hCoV-19/Italy/APU-IZSPB-266PT/2020 | EPI_ISL_653785 | 29/09/2020      | Europe / Italy / Apulia / Foggia                          | B.1.1.277  |
| hCoV-19/Italy/APU-IZSPB-267PT/2020 | EPI_ISL_653786 | 30/09/2020      | Europe / Italy / Apulia / Bari / Gravina di Puglia        | B.1.177    |
| hCoV-19/Italy/APU-IZSPB-269PT/2020 | EPI_ISL_653765 | 02/11/2020      | Europe / Italy / Apulia / Bari / Acquaviva delle Fonti    | B.1.177    |
| hCoV-19/Italy/APU-IZSPB-271PT/2020 | EPI_ISL_653766 | 02/11/2020      | Europe / Italy / Apulia / Brindisi                        | B.1.160    |
| hCoV-19/Italy/APU-IZSPB-272PT/2020 | EPI_ISL_653767 | 02/11/2020      | Europe / Italy / Apulia / Bari / Castellana Grotte        | B.1.160    |
| hCoV-19/Italy/APU-IZSPB-274PT/2020 | EPI_ISL_653768 | 02/11/2020      | Europe / Italy / Apulia / Brindisi / Ostuni               | B.1.177    |
| hCoV-19/Italy/APU-IZSPB-275PT/2020 | EPI_ISL_653769 | 02/11/2020      | Europe / Italy / Apulia / Brindisi / Francavilla Fontana  | B.1.177    |
| hCoV-19/Italy/APU-IZSPB-276PT/2020 | EPI_ISL_653770 | 02/11/2020      | Europe / Italy / Apulia / Brindisi                        | B.1.160    |
| hCoV-19/Italy/APU-IZSPB-277PT/2020 | EPI_ISL_653771 | 02/11/2020      | Europe / Italy / Apulia / Brindisi                        | B.1.160    |
| hCoV-19/Italy/APU-IZSPB-278PT/2020 | EPI_ISL_653772 | 02/11/2020      | Europe / Italy / Apulia / Brindisi                        | B.1.160    |
| hCoV-19/Italy/APU-IZSPB-280PT/2020 | EPI_ISL_653773 | 02/11/2020      | Europe / Italy / Apulia / Brindisi / Francavilla Fontana  | B.1.177    |
| hCoV-19/Italy/APU-IZSPB-281PT/2020 | EPI_ISL_653774 | 02/11/2020      | Europe / Italy / Apulia / Brindisi / Francavilla Fontana  | B.1.177    |
| hCoV-19/Italy/APU-IZSPB-282PT/2020 | EPI_ISL_653775 | 02/11/2020      | Europe / Italy / Apulia / Brindisi                        | B.1.177    |
| hCoV-19/Italy/APU-IZSPB-284PT/2020 | EPI_ISL_653776 | 02/11/2020      | Europe / Italy / Apulia / Brindisi                        | B.1.160    |
| hCoV-19/Italy/APU-IZSPB-285PT/2020 | EPI_ISL_653777 | 02/11/2020      | Europe / Italy / Apulia / Brindisi / San Pietro Vernotico | B.1.160    |
| hCoV-19/Italy/APU-IZSPB-286PT/2020 | EPI_ISL_653778 | 02/11/2020      | Europe / Italy / Apulia / Brindisi / San Pietro Vernotico | B.1.160    |
| hCoV-19/Italy/APU-IZSPB-287PT/2020 | EPI_ISL_653779 | 02/11/2020      | Europe / Italy / Apulia / Brindisi / Erchia               | B.1.177    |
| hCoV-19/Italy/APU-IZSPB-289PT/2020 | EPI_ISL_653780 | 02/11/2020      | Europe / Italy / Apulia / Brindisi                        | B.1.258.14 |
| hCoV-19/Italy/APU-IZSPB-290PT/2020 | EPI_ISL_653781 | 02/11/2020      | Europe / Italy / Apulia / Brindisi / Ostuni               | B.1.177    |
| hCoV-19/Italy/APU-IZSPB-291PT/2020 | EPI_ISL_653782 | 30/10/2020      | Europe / Italy / Apulia / Brindisi / Fasano               | B.1.1.1    |

|                                    |                |                                                                     |            |
|------------------------------------|----------------|---------------------------------------------------------------------|------------|
| hCoV-19/Italy/APU-IZSPB_292PT/2020 | EPI_ISL_653783 | 02/11/2020 Europe / Italy / Apulia / Brindisi                       | B.1.160    |
| hCoV-19/Italy/APU-IZSPB_293PT/2020 | EPI_ISL_653787 | 03/11/2020 Europe / Italy / Apulia / Taranto / Martina Franca       | B.1.1.1    |
| hCoV-19/Italy/APU-IZSPB_294PT/2020 | EPI_ISL_653788 | 03/11/2020 Europe / Italy / Apulia / Bari / Monopoli                | B.1.177    |
| hCoV-19/Italy/APU-IZSPB_295PT/2020 | EPI_ISL_653789 | 03/11/2020 Europe / Italy / Apulia / Martina Franca                 | B.1.1.1    |
| hCoV-19/Italy/APU-IZSPB_296PT/2020 | EPI_ISL_653790 | 03/11/2020 Europe / Italy / Apulia / Martina Franca                 | B.1.1.1    |
| hCoV-19/Italy/APU-IZSPB_297PT/2020 | EPI_ISL_653791 | 03/11/2020 Europe / Italy / Apulia / Bari / Altamura                | B.1.1.229  |
| hCoV-19/Italy/BAS-IZSPB_298PT/2020 | EPI_ISL_653792 | 03/11/2020 Europe / Italy / Basilicata / Matera / Ferrandina        | B.1.1.277  |
| hCoV-19/Italy/APU-IZSPB_299PT/2020 | EPI_ISL_653793 | 03/11/2020 Europe / Italy / Apulia / Bari                           | B.1.160    |
| hCoV-19/Italy/APU-IZSPB_300PT/2020 | EPI_ISL_653794 | 03/11/2020 Europe / Italy / Apulia / Bari / Turi                    | B.1.1.277  |
| hCoV-19/Italy/APU-IZSPB_301PT/2020 | EPI_ISL_653795 | 03/11/2020 Europe / Italy / Apulia / Bari / Monopoli                | B.1.416    |
| hCoV-19/Italy/APU-IZSPB_302PT/2020 | EPI_ISL_653796 | 03/11/2020 Europe / Italy / Apulia / Bari / Acquaviva delle Fonti   | B.1.177    |
| hCoV-19/Italy/APU-IZSPB_303PT/2020 | EPI_ISL_653797 | 03/11/2020 Europe / Italy / Apulia / Bari / Acquaviva delle Fonti   | B.1.177    |
| hCoV-19/Italy/APU-IZSPB_304PT/2020 | EPI_ISL_653798 | 03/11/2020 Europe / Italy / Apulia / Bari / Acquaviva delle Fonti   | B.1.177    |
| hCoV-19/Italy/APU-IZSPB_305PT/2020 | EPI_ISL_653799 | 03/11/2020 Europe / Italy / Apulia / Bari / Locorotondo             | B.1.177    |
| hCoV-19/Italy/APU-IZSPB_306PT/2020 | EPI_ISL_653800 | 03/11/2020 Europe / Italy / Apulia / Bari / Alberobello             | B.1.1.39   |
| hCoV-19/Italy/APU-IZSPB_307PT/2020 | EPI_ISL_653801 | 02/11/2020 Europe / Italy / Apulia / Brindisi / Latiano             | B.1.177    |
| hCoV-19/Italy/APU-IZSPB_308PT/2020 | EPI_ISL_653802 | 24/10/2020 Europe / Italy / Apulia / Bari / Monopoli                | B.1.1.229  |
| hCoV-19/Italy/APU-IZSPB_309PT/2020 | EPI_ISL_653803 | 24/10/2020 Europe / Italy / Apulia / Bari / Monopoli                | B.1.1.229  |
| hCoV-19/Italy/APU-IZSPB_310PT/2020 | EPI_ISL_653804 | 03/11/2020 Europe / Italy / Apulia / Bari / Sammichele di Bari      | B.1.177    |
| hCoV-19/Italy/APU-IZSPB_311PT/2020 | EPI_ISL_653805 | 03/11/2020 Europe / Italy / Apulia / Bari / Monopoli                | B.1.1.229  |
| hCoV-19/Italy/APU-IZSPB_312PT/2020 | EPI_ISL_653806 | 03/11/2020 Europe / Italy / Apulia / Bari / Putignano               | B.1.177    |
| hCoV-19/Italy/APU-IZSPB_313PT/2020 | EPI_ISL_653807 | 02/11/2020 Europe / Italy / Apulia / Brindisi / Ceglie Messapica    | B.1.160    |
| hCoV-19/Italy/APU-IZSPB_314PT/2020 | EPI_ISL_653808 | 02/11/2020 Europe / Italy / Apulia / Brindisi / Carovigno           | B.1.177    |
| hCoV-19/Italy/APU-IZSPB_315PT/2020 | EPI_ISL_653809 | 02/11/2020 Europe / Italy / Apulia / Brindisi                       | B.1.160    |
| hCoV-19/Italy/APU-IZSPB_316PT/2020 | EPI_ISL_653810 | 31/10/2020 Europe / Italy / Apulia / Brindisi                       | B.1.258.14 |
| hCoV-19/Italy/APU-IZSPB_317PT/2020 | EPI_ISL_653811 | 02/11/2020 Europe / Italy / Apulia / Brindisi                       | B.1.258.14 |
| hCoV-19/Italy/APU-IZSPB_318PT/2020 | EPI_ISL_653812 | 02/11/2020 Europe / Italy / Apulia / Brindisi / Fasano              | B.1.177    |
| hCoV-19/Italy/APU-IZSPB_319PT/2020 | EPI_ISL_653813 | 11/04/2020 Europe / Italy / Apulia / Brindisi                       | B.1.1.74   |
| hCoV-19/Italy/APU-IZSPB_321PT/2020 | EPI_ISL_653814 | 11/04/2020 Europe / Italy / Apulia / Brindisi                       | B.1.1.277  |
| hCoV-19/Italy/APU-IZSPB_322PT/2020 | EPI_ISL_653815 | 11/04/2020 Europe / Italy / Apulia / Brindisi                       | B.1.1.74   |
| hCoV-19/Italy/APU-IZSPB_323PT/2020 | EPI_ISL_653816 | 11/04/2020 Europe / Italy / Apulia / Brindisi                       | B.1.1.74   |
| hCoV-19/Italy/APU-IZSPB_324PT/2020 | EPI_ISL_653817 | 11/04/2020 Europe / Italy / Apulia / Brindisi                       | B.1.1.74   |
| hCoV-19/Italy/APU-IZSPB_325PT/2020 | EPI_ISL_653818 | 11/04/2020 Europe / Italy / Apulia / Brindisi                       | B.1.1.74   |
| hCoV-19/Italy/APU-IZSPB_326PT/2020 | EPI_ISL_653819 | 04/11/2020 Europe / Italy / Apulia / Bari                           | B.1.177    |
| hCoV-19/Italy/APU-IZSPB_327PT/2020 | EPI_ISL_653820 | 06/11/2020 Europe / Italy / Apulia / Bari / Putignano               | B.1.160    |
| hCoV-19/Italy/APU-IZSPB_328PT/2020 | EPI_ISL_653821 | 27/10/2020 Europe / Italy / Apulia / Bari                           | B.1.1.277  |
| hCoV-19/Italy/APU-IZSPB_329PT/2020 | EPI_ISL_653822 | 04/11/2020 Europe / Italy / Apulia / Bari                           | B.1.177    |
| hCoV-19/Italy/APU-IZSPB_330PT/2020 | EPI_ISL_722908 | 21/10/2020 Europe / Italy / Apulia / Foggia                         | B.1.177    |
| hCoV-19/Italy/APU-IZSPB_331PT/2020 | EPI_ISL_722911 | 05/11/2020 Europe / Italy / Apulia / Foggia / Lucera                | B.1.177    |
| hCoV-19/Italy/APU-IZSPB_332PT/2020 | EPI_ISL_722893 | 10/10/2020 Europe / Italy / Apulia / Foggia                         | B.1.416    |
| hCoV-19/Italy/APU-IZSPB_333PT/2020 | EPI_ISL_722894 | 05/11/2020 Europe / Italy / Apulia / Foggia / Lucera                | B.1.177    |
| hCoV-19/Italy/APU-IZSPB_334PT/2020 | EPI_ISL_722909 | 04/11/2020 Europe / Italy / Apulia / Foggia / Lucera                | B.1.177    |
| hCoV-19/Italy/APU-IZSPB_335PT/2020 | EPI_ISL_722910 | 20/11/2020 Europe / Italy / Apulia / Foggia                         | B.1.160    |
| hCoV-19/Italy/BAS-IZSPB_336PT/2020 | EPI_ISL_722901 | 28/10/2020 Europe / Italy / Basilicata / Matera / Montalbano Jonico | B.1.177    |
| hCoV-19/Italy/BAS-IZSPB_338PT/2020 | EPI_ISL_722873 | 27/10/2020 Europe / Italy / Basilicata / Matera / Policoro          | B.1.258    |
| hCoV-19/Italy/BAS-IZSPB_339PT/2020 | EPI_ISL_722874 | 29/10/2020 Europe / Italy / Basilicata / Matera / Garaguso          | B.1.1.229  |
| hCoV-19/Italy/BAS-IZSPB_341PT/2020 | EPI_ISL_722875 | 28/10/2020 Europe / Italy / Basilicata / Matera                     | B.1.177    |
| hCoV-19/Italy/BAS-IZSPB_351PT/2020 | EPI_ISL_722876 | 28/10/2020 Europe / Italy / Basilicata / Matera                     | B.1.177    |
| hCoV-19/Italy/BAS-IZSPB_352PT/2020 | EPI_ISL_722913 | 28/10/2020 Europe / Italy / Basilicata / Matera                     | B.1.177    |
| hCoV-19/Italy/BAS-IZSPB_356PT/2020 | EPI_ISL_722914 | 28/10/2020 Europe / Italy / Basilicata / Matera                     | B.1.160    |
| hCoV-19/Italy/BAS-IZSPB_357PT/2020 | EPI_ISL_722902 | 27/10/2020 Europe / Italy / Basilicata / Matera / Policoro          | B.1.258    |
| hCoV-19/Italy/BAS-IZSPB_358PT/2020 | EPI_ISL_722903 | 29/10/2020 Europe / Italy / Basilicata / Potenza / Lauria           | B.1.1.229  |
| hCoV-19/Italy/BAS-IZSPB_359PT/2020 | EPI_ISL_722877 | 29/10/2020 Europe / Italy / Basilicata / Potenza                    | B.1.160    |
| hCoV-19/Italy/BAS-IZSPB_364PT/2020 | EPI_ISL_722878 | 15/10/2020 Europe / Italy / Basilicata / Matera / Calciano          | B.1.177    |
| hCoV-19/Italy/BAS-IZSPB_365PT/2020 | EPI_ISL_722915 | 15/10/2020 Europe / Italy / Basilicata / Matera / Tricarico         | B.1.177    |
| hCoV-19/Italy/BAS-IZSPB_366PT/2020 | EPI_ISL_722916 | 15/10/2020 Europe / Italy / Basilicata / Matera / Calciano          | B.1.177    |
| hCoV-19/Italy/BAS-IZSPB_368PT/2020 | EPI_ISL_722879 | 16/10/2020 Europe / Italy / Basilicata / Potenza / Noepoli          | B.1.177    |
| hCoV-19/Italy/BAS-IZSPB_370PT/2020 | EPI_ISL_722904 | 16/10/2020 Europe / Italy / Basilicata / Potenza / Roccanova        | B.1.177    |
| hCoV-19/Italy/BAS-IZSPB_371PT/2020 | EPI_ISL_722917 | 16/10/2020 Europe / Italy / Basilicata / Matera                     | B.1.177    |

|                                    |                |                                                                  |           |
|------------------------------------|----------------|------------------------------------------------------------------|-----------|
| hCoV-19/Italy/BAS-IZSPB-372PT/2020 | EPI_ISL_722905 | 28/10/2020 Europe / Italy / Basilicata / Matera / Irsina         | B.1.177   |
| hCoV-19/Italy/BAS-IZSPB-373PT/2020 | EPI_ISL_722880 | 16/10/2020 Europe / Italy / Basilicata / Matera / Miglionico     | B.1.177   |
| hCoV-19/Italy/BAS-IZSPB-374PT/2020 | EPI_ISL_722881 | 16/10/2020 Europe / Italy / Basilicata / Matera / Miglionico     | B.1.177   |
| hCoV-19/Italy/APU-IZSPB-377PT/2020 | EPI_ISL_722918 | 14/10/2020 Europe / Italy / Apulia / Bari                        | B.1.177   |
| hCoV-19/Italy/BAS-IZSPB-378PT/2020 | EPI_ISL_722919 | 17/10/2020 Europe / Italy / Basilicata / Matera                  | B.1.177   |
| hCoV-19/Italy/BAS-IZSPB-379PT/2020 | EPI_ISL_722906 | 26/10/2020 Europe / Italy / Basilicata / Matera / Accettura      | B.1.1.229 |
| hCoV-19/Italy/BAS-IZSPB-380PT/2020 | EPI_ISL_722882 | 25/10/2020 Europe / Italy / Basilicata / Matera                  | B.1.177   |
| hCoV-19/Italy/BAS-IZSPB-381PT/2020 | EPI_ISL_722883 | 26/10/2020 Europe / Italy / Basilicata / Matera                  | B.1.177   |
| hCoV-19/Italy/BAS-IZSPB-382PT/2020 | EPI_ISL_722907 | 19/10/2020 Europe / Italy / Basilicata / Matera                  | B.1.177   |
| hCoV-19/Italy/BAS-IZSPB-383PT/2020 | EPI_ISL_722884 | 25/10/2020 Europe / Italy / Basilicata / Matera                  | B.1.177   |
| hCoV-19/Italy/BAS-IZSPB-384PT/2020 | EPI_ISL_722885 | 20/10/2020 Europe / Italy / Basilicata / Matera / Rotondella     | B.1.177   |
| hCoV-19/Italy/BAS-IZSPB-385PT/2020 | EPI_ISL_722886 | 20/10/2020 Europe / Italy / Basilicata / Potenza / Roccanova     | B.1.177   |
| hCoV-19/Italy/BAS-IZSPB-386PT/2020 | EPI_ISL_722920 | 25/10/2020 Europe / Italy / Basilicata / Matera                  | B.1.177   |
| hCoV-19/Italy/BAS-IZSPB-387PT/2020 | EPI_ISL_722921 | 20/10/2020 Europe / Italy / Basilicata / Matera / Irsina         | B.1.177   |
| hCoV-19/Italy/BAS-IZSPB-388PT/2020 | EPI_ISL_722887 | 26/10/2020 Europe / Italy / Basilicata / Matera                  | B.1.177   |
| hCoV-19/Italy/BAS-IZSPB-389PT/2020 | EPI_ISL_722888 | 25/10/2020 Europe / Italy / Basilicata / Potenza / Roccanova     | B.1.177   |
| hCoV-19/Italy/BAS-IZSPB-390PT/2020 | EPI_ISL_722889 | 25/10/2020 Europe / Italy / Basilicata / Matera                  | B.1.177   |
| hCoV-19/Italy/BAS-IZSPB-391PT/2020 | EPI_ISL_722890 | 25/10/2020 Europe / Italy / Basilicata / Matera                  | B.1.177   |
| hCoV-19/Italy/BAS-IZSPB-392PT/2020 | EPI_ISL_722922 | 24/10/2020 Europe / Italy / Basilicata / Matera / Tursi          | B.1.177   |
| hCoV-19/Italy/BAS-IZSPB-393PT/2020 | EPI_ISL_722923 | 25/10/2020 Europe / Italy / Basilicata / Potenza / Roccanova     | B.1.177   |
| hCoV-19/Italy/BAS-IZSPB-395PT/2020 | EPI_ISL_722924 | 21/10/2020 Europe / Italy / Basilicata / Matera / Irsina         | B.1.177   |
| hCoV-19/Italy/BAS-IZSPB-397PT/2020 | EPI_ISL_722925 | 21/10/2020 Europe / Italy / Basilicata / Matera / Irsina         | B.1.177   |
| hCoV-19/Italy/BAS-IZSPB-398PT/2020 | EPI_ISL_722891 | 25/10/2020 Europe / Italy / Basilicata / Matera / Montescaglioso | B.1.177   |
| hCoV-19/Italy/APU-IZSPB-399PT/2020 | EPI_ISL_745193 | 21/12/2020 Europe / Italy / Apulia / Bari / Casamassima          | B.1.1.7   |
| hCoV-19/Italy/APU-IZSPB-400PT/2020 | EPI_ISL_745192 | 21/12/2020 Europe / Italy / Apulia / Bari / Molfetta             | B.1.1.7   |
| hCoV-19/Italy/APU-IZSPB_404PT/2020 | EPI_ISL_794746 | 24/12/2020 Europe / Italy / Apulia / Bari                        | B.1.177   |
| hCoV-19/Italy/APU-IZSPB_405PT/2020 | EPI_ISL_794747 | 23/12/2020 Europe / Italy / Apulia / Lecce                       | B.1.1.7   |
| hCoV-19/Italy/APU-IZSPB_406PT/2020 | EPI_ISL_794748 | 24/12/2020 Europe / Italy / Apulia / Bari                        | B.1.1.7   |
| hCoV-19/Italy/APU-IZSPB_407PT/2020 | EPI_ISL_794749 | 25/11/2020 Europe / Italy / Apulia / Bari                        | B.1       |
| hCoV-19/Italy/APU-IZSPB_408PT/2020 | EPI_ISL_794750 | 22/12/2020 Europe / Italy / Apulia / Lecce                       | B.1.1.7   |
| hCoV-19/Italy/APU-IZSPB_409PT/2020 | EPI_ISL_794751 | 23/12/2020 Europe / Italy / Apulia / Lecce                       | B.1.1.7   |
| hCoV-19/Italy/APU-IZSPB_411PT/2020 | EPI_ISL_794752 | 23/12/2020 Europe / Italy / Apulia / BAT                         | B.1.1.204 |
| hCoV-19/Italy/APU-IZSPB_412PT/2020 | EPI_ISL_794753 | 22/12/2020 Europe / Italy / Apulia / Lecce                       | B.1.177   |
| hCoV-19/Italy/APU-IZSPB_413PT/2020 | EPI_ISL_794754 | 16/12/2020 Europe / Italy / Apulia / Foggia                      | B.1.177   |
| hCoV-19/Italy/APU-IZSPB_414PT/2020 | EPI_ISL_794755 | 25/11/2020 Europe / Italy / Apulia / Foggia                      | B.1       |
| hCoV-19/Italy/APU-IZSPB_415PT/2020 | EPI_ISL_794756 | 22/12/2020 Europe / Italy / Apulia / Brindisi                    | B.1.160   |
| hCoV-19/Italy/APU-IZSPB_417PT/2020 | EPI_ISL_794757 | 22/12/2020 Europe / Italy / Apulia / Brindisi                    | B.1.160   |
| hCoV-19/Italy/APU-IZSPB_418PT/2020 | EPI_ISL_794758 | 23/12/2020 Europe / Italy / Apulia / Brindisi                    | B.1.177   |
| hCoV-19/Italy/APU-IZSPB-421PT/2020 | EPI_ISL_876738 | 29/12/2020 Europe / Italy / Apulia / Taranto / Martina Franca    | B.1.177   |
| hCoV-19/Italy/APU-IZSPB_423PT/2020 | EPI_ISL_794759 | 22/12/2020 Europe / Italy / Apulia / Foggia                      | B.1.177   |
| hCoV-19/Italy/APU-IZSPB_424PT/2020 | EPI_ISL_794760 | 11/12/2020 Europe / Italy / Apulia / Foggia                      | B.1.177   |
| hCoV-19/Italy/APU-IZSPB_425PT/2020 | EPI_ISL_794761 | 11/12/2020 Europe / Italy / Apulia / Foggia                      | B.1.177   |
| hCoV-19/Italy/APU-IZSPB_426PT/2020 | EPI_ISL_794762 | 11/12/2020 Europe / Italy / Apulia / Foggia                      | B.1.177   |
| hCoV-19/Italy/APU-IZSPB-427PT/2020 | EPI_ISL_876800 | 11/12/2020 Europe / Italy / Apulia / Foggia                      | B.1.177   |
| hCoV-19/Italy/APU-IZSPB-428PT/2020 | EPI_ISL_876801 | 11/12/2020 Europe / Italy / Apulia / Foggia                      | B.1.177   |
| hCoV-19/Italy/APU-IZSPB-429PT/2020 | EPI_ISL_876802 | 11/12/2020 Europe / Italy / Apulia / Foggia                      | B.1.177   |
| hCoV-19/Italy/APU-IZSPB-430PT/2020 | EPI_ISL_876803 | 11/12/2020 Europe / Italy / Apulia / Foggia                      | B.1.177   |
| hCoV-19/Italy/APU-IZSPB_431PT/2020 | EPI_ISL_794763 | 11/12/2020 Europe / Italy / Apulia / Foggia                      | B.1.177   |
| hCoV-19/Italy/APU-IZSPB_432PT/2020 | EPI_ISL_794764 | 11/12/2020 Europe / Italy / Apulia / Foggia                      | B.1.177.8 |
| hCoV-19/Italy/APU-IZSPB_433PT/2020 | EPI_ISL_794765 | 11/12/2020 Europe / Italy / Apulia / Foggia                      | B.1.177   |
| hCoV-19/Italy/APU-IZSPB_434PT/2020 | EPI_ISL_794766 | 11/12/2020 Europe / Italy / Apulia / Foggia                      | B.1.177   |
| hCoV-19/Italy/APU-IZSPB_435PT/2020 | EPI_ISL_794767 | 11/12/2020 Europe / Italy / Apulia / Foggia                      | B.1.177   |
| hCoV-19/Italy/APU-IZSPB_436PT/2020 | EPI_ISL_794768 | 11/12/2020 Europe / Italy / Apulia / Foggia                      | B.1.177   |
| hCoV-19/Italy/APU-IZSPB_437PT/2020 | EPI_ISL_794769 | 11/12/2020 Europe / Italy / Apulia / Foggia                      | B.1.177   |
| hCoV-19/Italy/APU-IZSPB_438PT/2020 | EPI_ISL_794770 | 11/12/2020 Europe / Italy / Apulia / Foggia                      | B.1.177   |
| hCoV-19/Italy/APU-IZSPB-439PT/2020 | EPI_ISL_876804 | 11/12/2020 Europe / Italy / Apulia / Foggia                      | B.1.177   |
| hCoV-19/Italy/APU-IZSPB-440PT/2020 | EPI_ISL_876805 | 11/12/2020 Europe / Italy / Apulia / Foggia                      | B.1.177   |
| hCoV-19/Italy/APU-IZSPB-441PT/2020 | EPI_ISL_876806 | 11/12/2020 Europe / Italy / Apulia / Foggia                      | B.1.177   |
| hCoV-19/Italy/APU-IZSPB-442PT/2020 | EPI_ISL_876807 | 11/12/2020 Europe / Italy / Apulia / Foggia                      | B.1.177   |

[illegible]



|                                     |                |                                                                |           |
|-------------------------------------|----------------|----------------------------------------------------------------|-----------|
| hCoV-19/Italy/APU-IZSPB-507PT/2020  | EPI_ISL_876789 | 14/12/2020 Europe / Italy / Apulia / Foggia                    | B.1.416   |
| hCoV-19/Italy/APU-IZSPB-508PT/2020  | EPI_ISL_876796 | 12/12/2020 Europe / Italy / Apulia / Foggia                    | B.1.221   |
| hCoV-19/Italy/APU-IZSPB-509PT/2020  | EPI_ISL_876790 | 14/12/2020 Europe / Italy / Apulia / Foggia                    | B.1.416   |
| hCoV-19/Italy/APU-IZSPB-510PT/2020  | EPI_ISL_876797 | 12/12/2020 Europe / Italy / Apulia / Foggia                    | B.1.416   |
| hCoV-19/Italy/APU-IZSPB-511PT/2020  | EPI_ISL_876791 | 14/12/2020 Europe / Italy / Apulia / Foggia                    | B.1.177   |
| hCoV-19/Italy/APU-IZSPB-512PT/2020  | EPI_ISL_876798 | 12/12/2020 Europe / Italy / Apulia / Foggia                    | B.1.177   |
| hCoV-19/Italy/APU-IZSPB-513PT/2020  | EPI_ISL_876799 | 12/12/2020 Europe / Italy / Apulia / Foggia                    | B.1.177   |
| hCoV-19/Italy/APU-IZSPB-514PT/2020  | EPI_ISL_876792 | 14/12/2020 Europe / Italy / Apulia / Foggia                    | B.1.177   |
| hCoV-19/Italy/APU-IZSPB-515PT/2020  | EPI_ISL_876793 | 14/12/2020 Europe / Italy / Apulia / Foggia                    | B.1.177   |
| hCoV-19/Italy/APU-IZSPB-516PT/2020  | EPI_ISL_876776 | 17/12/2020 Europe / Italy / Apulia / Lecce / Vernole           | B.1.177   |
| hCoV-19/Italy/APU-IZSPB-517PT/2020  | EPI_ISL_876778 | 16/12/2020 Europe / Italy / Apulia / Foggia                    | B.1.177   |
| hCoV-19/Italy/APU-IZSPB-518PT/2020  | EPI_ISL_876777 | 17/12/2020 Europe / Italy / Apulia / Foggia                    | B.1.177   |
| hCoV-19/Italy/APU-IZSPB-519PT/2020  | EPI_ISL_876808 | 11/12/2020 Europe / Italy / Apulia / Foggia                    | B.1.177   |
| hCoV-19/Italy/APU-IZSPB-520PT/2020  | EPI_ISL_876809 | 11/12/2020 Europe / Italy / Apulia / Foggia                    | B.1.177   |
| hCoV-19/Italy/APU-IZSPB-521PT/2020  | EPI_ISL_876784 | 15/12/2020 Europe / Italy / Apulia / BAT / Bisceglie           | B.1.177   |
| hCoV-19/Italy/APU-IZSPB-522PT/2020  | EPI_ISL_876785 | 15/12/2020 Europe / Italy / Apulia / Foggia                    | B.1.177   |
| hCoV-19/Italy/APU-IZSPB-523PT/2020  | EPI_ISL_876794 | 14/12/2020 Europe / Italy / Apulia / Foggia                    | B.1.177.8 |
| hCoV-19/Italy/APU-IZSPB-524PT/2020  | EPI_ISL_876786 | 15/12/2020 Europe / Italy / Apulia / Foggia                    | B.1.177   |
| hCoV-19/Italy/APU-IZSPB-525PT/2020  | EPI_ISL_876748 | 23/12/2020 Europe / Italy / Apulia / Foggia                    | B.1.177   |
| hCoV-19/Italy/APU-IZSPB-526PT/2020  | EPI_ISL_876749 | 23/12/2020 Europe / Italy / Apulia / Foggia / Mattinata        | B.1.177   |
| hCoV-19/Italy/APU-IZSPB-527PT/2020  | EPI_ISL_876751 | 22/12/2020 Europe / Italy / Apulia / Foggia                    | B.1.177   |
| hCoV-19/Italy/APU-IZSPB-528PT/2020  | EPI_ISL_876750 | 23/12/2020 Europe / Italy / Apulia / Foggia                    | B.1.177   |
| hCoV-19/Italy/APU-IZSPB-529PT/2020  | EPI_ISL_876779 | 16/12/2020 Europe / Italy / Apulia / Foggia                    | B.1.177   |
| hCoV-19/Italy/APU-IZSPB-530PT/2020  | EPI_ISL_876780 | 16/12/2020 Europe / Italy / Apulia / Foggia                    | B.1.177   |
| hCoV-19/Italy/APU-IZSPB-531PT/2020  | EPI_ISL_876781 | 16/12/2020 Europe / Italy / Apulia / Foggia                    | B.1.177   |
| hCoV-19/Italy/APU-IZSPB-532PT/2020  | EPI_ISL_876782 | 16/12/2020 Europe / Italy / Apulia / Foggia                    | B.1.177   |
| hCoV-19/Italy/APU-IZSPB-533PT/2020  | EPI_ISL_876783 | 16/12/2020 Europe / Italy / Apulia / Foggia                    | B.1.177   |
| hCoV-19/Italy/APU-IZSPB-534PT/2020  | EPI_ISL_876760 | 20/12/2020 Europe / Italy / Apulia / Foggia                    | B.1.177   |
| hCoV-19/Italy/APU-IZSPB-535PT/2020  | EPI_ISL_876752 | 21/12/2020 Europe / Italy / Apulia / Foggia                    | B.1.177   |
| hCoV-19/Italy/APU-IZSPB-536PT/2020  | EPI_ISL_876761 | 20/12/2020 Europe / Italy / Apulia / Foggia                    | B.1.177   |
| hCoV-19/Italy/APU-IZSPB-537PT/2020  | EPI_ISL_876762 | 20/12/2020 Europe / Italy / Apulia / Foggia                    | B.1.177   |
| hCoV-19/Italy/APU-IZSPB-538PT/2020  | EPI_ISL_876753 | 21/12/2020 Europe / Italy / Apulia / Foggia                    | B.1.177   |
| hCoV-19/Italy/APU-IZSPB-539PT/2020  | EPI_ISL_876740 | 21/12/2020 Europe / Italy / Apulia / Foggia                    | B.1.416   |
| hCoV-19/Italy/APU-IZSPB-540PT/2020  | EPI_ISL_876763 | 20/12/2020 Europe / Italy / Apulia / Foggia                    | B.1.177   |
| hCoV-19/Italy/APU-IZSPB-541PT/2020  | EPI_ISL_876754 | 21/12/2020 Europe / Italy / Apulia / Foggia                    | B.1.177   |
| hCoV-19/Italy/APU-IZSPB-542PT/2020  | EPI_ISL_876764 | 20/12/2020 Europe / Italy / Apulia / Foggia                    | B.1.177   |
| hCoV-19/Italy/APU-IZSPB-543PT/2020  | EPI_ISL_876755 | 21/12/2020 Europe / Italy / Apulia / Foggia                    | B.1.177   |
| hCoV-19/Italy/APU-IZSPB-544PT/2020  | EPI_ISL_876756 | 21/12/2020 Europe / Italy / Apulia / Foggia                    | B.1.177   |
| hCoV-19/Italy/APU-IZSPB-545PT/2020  | EPI_ISL_876765 | 20/12/2020 Europe / Italy / Apulia / Foggia                    | B.1.177   |
| hCoV-19/Italy/APU-IZSPB-546PT/2020  | EPI_ISL_876766 | 20/12/2020 Europe / Italy / Apulia / Foggia                    | B.1.177   |
| hCoV-19/Italy/APU-IZSPB-547PT/2020  | EPI_ISL_876767 | 20/12/2020 Europe / Italy / Apulia / Foggia                    | B.1.177   |
| hCoV-19/Italy/APU-IZSPB-548PT/2020  | EPI_ISL_876768 | 20/12/2020 Europe / Italy / Apulia / Foggia                    | B.1.177   |
| hCoV-19/Italy/APU-IZSPB-549PT/2020  | EPI_ISL_876769 | 20/12/2020 Europe / Italy / Apulia / Foggia                    | B.1.177   |
| hCoV-19/Italy/APU-IZSPB-550PT/2020  | EPI_ISL_876757 | 21/12/2020 Europe / Italy / Apulia / Foggia                    | B.1.177   |
| hCoV-19/Italy/APU-IZSPB-551PT/2020  | EPI_ISL_876770 | 20/12/2020 Europe / Italy / Apulia / Foggia                    | B.1.177   |
| hCoV-19/Italy/APU-IZSPB-552PT/2020  | EPI_ISL_876771 | 20/12/2020 Europe / Italy / Apulia / Foggia                    | B.1.177   |
| hCoV-19/Italy/APU-IZSPB-553PT/2020  | EPI_ISL_876772 | 20/12/2020 Europe / Italy / Apulia / Foggia                    | B.1.177   |
| hCoV-19/Italy/APU-IZSPB-554PT/2020  | EPI_ISL_876773 | 20/12/2020 Europe / Italy / Apulia / Foggia                    | B.1.177   |
| hCoV-19/Italy/APU-IZSPB-555PT/2020  | EPI_ISL_876774 | 20/12/2020 Europe / Italy / Apulia / Foggia                    | B.1.177   |
| hCoV-19/Italy/APU-IZSPB-557PT/2020  | EPI_ISL_876758 | 21/12/2020 Europe / Italy / Apulia / Foggia                    | B.1.177   |
| hCoV-19/Italy/APU-IZSPB-558PT/2020  | EPI_ISL_876775 | 20/12/2020 Europe / Italy / Apulia / Foggia                    | B.1.177   |
| hCoV-19/Italy/APU-IZSPB-559PT/2020  | EPI_ISL_876759 | 21/12/2020 Europe / Italy / Apulia / Foggia                    | B.1.177   |
| hCoV-19/Italy/APU-IZSPB-567PT/2020  | EPI_ISL_876810 | 24/10/2020 Europe / Italy / Apulia / BAT / Bisceglie           | B.1.1.229 |
| hCoV-19/Italy/APU-IZSPB-568PT/2021  | EPI_ISL_876741 | 11/01/2021 Europe / Italy / Apulia / Foggia / Peschici         | B.1.177   |
| hCoV-19/Italy/APU-IZSPB_572PT/2021  | EPI_ISL_918410 | 23/01/2021 Europe / Italy / Apulia / Bari                      | B.1.1.7   |
| hCoV-19/Italy/APU-IZSPB-142APT/2020 | EPI_ISL_722896 | 24/06/2020 Europe / Italy / Apulia / Bari / Mola di Bari       | B.1.1.162 |
| hCoV-19/Italy/APU-IZSPB-147APT/2020 | EPI_ISL_722855 | 20/07/2020 Europe / Italy / Apulia / Bari / Sammichele di Bari | B.1.1.1   |
| hCoV-19/Italy/APU-IZSPB-149APT/2020 | EPI_ISL_722912 | 2020 Europe / Italy / Apulia / Lecce / Galatina                | B.1.1.316 |
| hCoV-19/Italy/APU-IZSPB-151APT/2020 | EPI_ISL_722897 | 28/07/2020 Europe / Italy / Apulia / Bari / Modugno            | B.1.1.115 |

|                                     |                |            |                                             |           |
|-------------------------------------|----------------|------------|---------------------------------------------|-----------|
| hCoV-19/Italy/APU-IZSPB-153APT/2020 | EPI_ISL_722856 | 18/07/2020 | Europe / Italy / Apulia / Brindisi / Fasano | B.1.1.305 |
| hCoV-19/Italy/APU-IZSPB-156APT/2020 | EPI_ISL_722857 | 18/07/2020 | Europe / Italy / Apulia / Brindisi / Fasano | B.1.1.305 |
| hCoV-19/Italy/APU-IZSPB-159APT/2020 | EPI_ISL_722858 | 18/07/2020 | Europe / Italy / Apulia / Brindisi / Fasano | B.1.1.305 |
| hCoV-19/Italy/APU-IZSPB_169APT/2020 | EPI_ISL_794745 | 31/03/2020 | Europe / Italy / Apulia / Bari              | B.1.1.74  |
| hCoV-19/Italy/APU-IZSPB-170APT/2020 | EPI_ISL_649190 | 17/08/2020 | Europe / Italy / Apulia                     | B.1.1.316 |
| hCoV-19/Italy/APU-IZSPB-172APT/2020 | EPI_ISL_649191 | 20/08/2020 | Europe / Italy / Apulia                     | B.1.1.229 |
| hCoV-19/Italy/BAS-IZSPB-173APT/2020 | EPI_ISL_649784 | 2020       | Europe / Italy / Basilicata                 | B.1.416   |
| hCoV-19/Italy/APU-IZSPB-177APT/2020 | EPI_ISL_722851 | 28/08/2020 | Europe / Italy / Apulia / Bari / Triggiano  | B.1.1.229 |
| hCoV-19/Italy/APU-IZSPB-179APT/2020 | EPI_ISL_722852 | 28/08/2020 | Europe / Italy / Apulia / Bari              | B.1.1.229 |
| hCoV-19/Italy/APU-IZSPB-191APT/2020 | EPI_ISL_722853 | 28/08/2020 | Europe / Italy / Apulia / Bari              | B.1.1.229 |
| hCoV-19/Italy/APU-IZSPB-193APT/2020 | EPI_ISL_649940 | 28/08/2020 | Europe / Italy / Apulia / Foggia            | B.1       |
| hCoV-19/Italy/APU-IZSPB-199APT/2020 | EPI_ISL_722854 | 28/08/2020 | Europe / Italy / Apulia / Bari              | B.1.1.229 |
| hCoV-19/Italy/APU-IZSPB-98APT/2020  | EPI_ISL_649189 | 10/04/2020 | Europe / Italy / Apulia                     | B.1.1.317 |

**Table S1:** Data of 298 human SARS-CoV-2 genomes collected from Apulia and Basilicata, sequenced in this study and submitted on GISAID (Accession ID).

| GISAID<br>Accession | Ns  | Mapped<br>bases | Mean<br>coverage | Standard<br>deviation | Number of<br>reads | Mapped reads       | Read<br>min/max/mean<br>length | Overlapping read<br>pairs | Duplicate<br>d reads<br>(flagged) | Duplicated reads<br>(estimated) | Duplication<br>rate | Clipped reads    |
|---------------------|-----|-----------------|------------------|-----------------------|--------------------|--------------------|--------------------------------|---------------------------|-----------------------------------|---------------------------------|---------------------|------------------|
| EPI_ISL_876811      | 30  | 225091524       | 7,527.3894       | 55,168.7503           | 3,712,092          | 3,602,474 / 97.05% | 2 / 136 / 67.04                | 1,665,989 / 89.76%        | 0 / 0%                            | 3,588,247 / 96.66%              | 74.4%               | 613,242 / 16.52% |
| EPI_ISL_876812      | 50  | 181048592       | 6,054.5294       | 22,540.2039           | 2,085,198          | 2,069,110 / 99.23% | 15 / 136 / 94.63               | 991,790 / 95.13%          | 0 / 0%                            | 2,052,525 / 98.43%              | 74.74%              | 483,276 / 23.18% |
| EPI_ISL_876739      | 262 | 274795098       | 9,189.5495       | 82,257.4386           | 3,775,270          | 3,745,944 / 99.22% | 10 / 151 / 78.85               | 1,868,426 / 98.98%        | 0 / 0%                            | 3,740,491 / 99.08%              | 87.11%              | 672,304 / 17.81% |
| EPI_ISL_876813      | 44  | 200220360       | 6,695.6613       | 14,861.9755           | 2,302,438          | 1,796,246 / 78.01% | 14 / 136 / 107.27              | 886,648 / 77.02%          | 0 / 0%                            | 1,785,287 / 77.54%              | 65.89%              | 168,987 / 7.34%  |
| EPI_ISL_649189      | 4   | 139945680       | 4,679.988        | 2,468.0339            | 708,510            | 706,964 / 99.78%   | 16 / 236 / 198.83              | 339,011 / 95.7%           | 0 / 0%                            | 679,388 / 95.89%                | 91.08%              | 21,394 / 3.02%   |
| EPI_ISL_722896      | 3   | 133719733       | 4,471.7832       | 2,094.407             | 709,430            | 707,633 / 99.75%   | 14 / 236 / 189.51              | 352,478 / 99.37%          | 0 / 0%                            | 681,415 / 96.05%                | 88.99%              | 17,466 / 2.46%   |
| EPI_ISL_722855      | 29  | 74202288        | 2,481.4329       | 2,335.0135            | 440,630            | 383,537 / 87.04%   | 10 / 236 / 192.85              | 190,509 / 86.47%          | 0 / 0%                            | 362,212 / 82.2%                 | 80.89%              | 11,686 / 2.65%   |
| EPI_ISL_722912      | 2   | 104479918       | 3,493.9611       | 1,601.9464            | 582,626            | 580,285 / 99.6%    | 12 / 236 / 180.55              | 289,536 / 99.39%          | 0 / 0%                            | 554,789 / 95.22%                | 87.59%              | 13,122 / 2.25%   |
| EPI_ISL_722899      | 2   | 109275729       | 3,654.34         | 2,054.2373            | 583,122            | 561,106 / 96.22%   | 15 / 236 / 195.37              | 279,520 / 95.87%          | 0 / 0%                            | 536,146 / 91.94%                | 86.1%               | 16,887 / 2.9%    |
| EPI_ISL_722897      | 0   | 93070221        | 3,112.4041       | 1,314.0962            | 509,838            | 508,219 / 99.68%   | 17 / 236 / 183.89              | 250,778 / 98.38%          | 0 / 0%                            | 482,119 / 94.56%                | 87.49%              | 14,788 / 2.9%    |
| EPI_ISL_722856      | 63  | 82982123        | 2,775.0434       | 2,399.1444            | 487,268            | 425,053 / 87.23%   | 17 / 236 / 194.77              | 211,426 / 86.78%          | 0 / 0%                            | 402,855 / 82.68%                | 82.02%              | 13,958 / 2.86%   |
| EPI_ISL_722857      | 2   | 118795206       | 3,972.6852       | 1,998.6194            | 644,474            | 638,626 / 99.09%   | 14 / 236 / 186.75              | 318,069 / 98.71%          | 0 / 0%                            | 612,467 / 95.03%                | 88.43%              | 20,603 / 3.2%    |
| EPI_ISL_722872      | 11  | 118034579       | 3,947.2487       | 1,802.9499            | 626,43             | 624,551 / 99.7%    | 16 / 236 / 189.59              | 310,786 / 99.22%          | 0 / 0%                            | 598,515 / 95.54%                | 88.18%              | 15,514 / 2.48%   |
| EPI_ISL_722858      | 47  | 108381334       | 3,624.4301       | 2,256.6105            | 591,828            | 573,813 / 96.96%   | 15 / 236 / 189.35              | 286,049 / 96.67%          | 0 / 0%                            | 549,308 / 92.82%                | 85.88%              | 13,810 / 2.33%   |
| EPI_ISL_794745      | 7   | 88007278        | 2,943.0919       | 2,105.8589            | 492,798            | 441,695 / 89.63%   | 7 / 251 / 193.08               | 212,735 / 86.34%          | 0 / 0%                            | 420,455 / 85.32%                | 85.23%              | 32,027 / 6.5%    |
| EPI_ISL_649190      | 0   | 128942055       | 4,312.0107       | 1,873.8782            | 639,436            | 638,049 / 99.78%   | 14 / 236 / 202.64              | 301,441 / 94.28%          | 0 / 0%                            | 609,934 / 95.39%                | 92.39%              | 16,624 / 2.6%    |
| EPI_ISL_653823      | 3   | 112967855       | 3,777.8101       | 1,574.0779            | 555,246            | 554,335 / 99.84%   | 14 / 236 / 204.41              | 266,738 / 96.08%          | 0 / 0%                            | 526,634 / 94.85%                | 91.3%               | 13,138 / 2.37%   |
| EPI_ISL_649191      | 2   | 133364854       | 4,459.9155       | 2,271.2381            | 675,802            | 674,136 / 99.75%   | 16 / 236 / 198.82              | 327,112 / 96.81%          | 0 / 0%                            | 646,029 / 95.59%                | 92.53%              | 26,206 / 3.88%   |
| EPI_ISL_649784      | 0   | 148575038       | 4,968.5663       | 2,563.6788            | 746,894            | 745,463 / 99.81%   | 15 / 236 / 199.76              | 360,591 / 96.56%          | 0 / 0%                            | 717,929 / 96.12%                | 91.57%              | 18,569 / 2.49%   |
| EPI_ISL_722854      | 4   | 95157777        | 3,182.2151       | 1,472.8847            | 503,300            | 501,273 / 99.6%    | 16 / 236 / 190.37              | 249,002 / 98.95%          | 0 / 0%                            | 475,802 / 94.54%                | 86.73%              | 12,791 / 2.54%   |
| EPI_ISL_722859      | 16  | 82375406        | 2,754.7539       | 1,215.6234            | 418,370            | 417,319 / 99.75%   | 14 / 236 / 197.87              | 203,785 / 97.42%          | 0 / 0%                            | 391,913 / 93.68%                | 85.55%              | 9,989 / 2.39%    |
| EPI_ISL_722852      | 16  | 94148660        | 3,148.4687       | 1,491.6368            | 492,898            | 490,522 / 99.52%   | 16 / 236 / 192.5               | 243,634 / 98.86%          | 0 / 0%                            | 465,229 / 94.39%                | 86.24%              | 12,224 / 2.48%   |
| EPI_ISL_722898      | 3   | 102220434       | 3,418.4006       | 1,643.4721            | 535,430            | 533,240 / 99.59%   | 15 / 236 / 192.49              | 264,432 / 98.77%          | 0 / 0%                            | 507,121 / 94.71%                | 87.95%              | 19,813 / 3.7%    |
| EPI_ISL_722860      | 16  | 101602984       | 3,397.7522       | 1,571.1477            | 525,604            | 523,843 / 99.66%   | 16 / 236 / 194.53              | 258,380 / 98.32%          | 0 / 0%                            | 497,998 / 94.75%                | 86.97%              | 13,287 / 2.53%   |
| EPI_ISL_649785      | 29  | 41385249        | 1,383.9832       | 9,799.2031            | 794,512            | 646,318 / 81.35%   | 6 / 136 / 69.4                 | 304,439 / 76.64%          | 0 / 0%                            | 639,280 / 80.46%                | 66.79%              | 102,921 / 12.95% |
| EPI_ISL_722862      | 16  | 101997621       | 3,410.9494       | 1,538.4809            | 544,408            | 536,564 / 98.56%   | 14 / 236 / 191.37              | 263,221 / 96.7%           | 0 / 0%                            | 509,744 / 93.63%                | 89.06%              | 24,641 / 4.53%   |
| EPI_ISL_722863      | 10  | 104897245       | 3,507.9171       | 1,569.0165            | 544,430            | 542,898 / 99.72%   | 14 / 236 / 193.92              | 269,968 / 99.17%          | 0 / 0%                            | 516,770 / 94.92%                | 87.82%              | 19,305 / 3.55%   |
| EPI_ISL_722864      | 2   | 93930235        | 3,141.1643       | 1,418.6822            | 498,064            | 491,293 / 98.64%   | 16 / 236 / 191.83              | 244,590 / 98.22%          | 0 / 0%                            | 466,005 / 93.56%                | 85.94%              | 13,584 / 2.73%   |
| EPI_ISL_722895      | 3   | 126501814       | 4,230.4054       | 1,922.9264            | 672,55             | 670,610 / 99.71%   | 15 / 236 / 189.04              | 333,558 / 99.19%          | 0 / 0%                            | 644,265 / 95.79%                | 88.84%              | 14,847 / 2.21%   |
| EPI_ISL_722865      | 1   | 115843088       | 3,873.9621       | 2,077.0528            | 622,376            | 614,129 / 98.67%   | 14 / 236 / 189.09              | 304,537 / 97.86%          | 0 / 0%                            | 588,433 / 94.55%                | 87.34%              | 15,878 / 2.55%   |
| EPI_ISL_722866      | 24  | 113607763       | 3,799.2095       | 2,052.7834            | 636,688            | 614,838 / 96.57%   | 15 / 236 / 185.34              | 305,369 / 95.92%          | 0 / 0%                            | 589,050 / 92.52%                | 87.69%              | 15,740 / 2.47%   |
| EPI_ISL_649938      | 19  | 91623470        | 3,064.0227       | 19,436.7675           | 1,250,670          | 1,211,180 / 96.84% | 2 / 136 / 81.86                | 553,153 / 88.46%          | 0 / 0%                            | 1,203,063 / 96.19%              | 73.66%              | 377,490 / 30.18% |
| EPI_ISL_722853      | 7   | 119571401       | 3,998.6423       | 1,866.1171            | 609,092            | 607,309 / 99.71%   | 16 / 236 / 197.55              | 302,116 / 99.2%           | 0 / 0%                            | 581,204 / 95.42%                | 87.93%              | 19,160 / 3.15%   |
| EPI_ISL_649939      | 25  | 21330340        | 7133207          | 3,335.5042            | 288,532            | 279,846 / 96.99%   | 3 / 136 / 80.69                | 122,390 / 84.84%          | 0 / 0%                            | 273,692 / 94.86%                | 65.79%              | 43,188 / 14.97%  |
| EPI_ISL_649940      | 7   | 202821692       | 6,782.6536       | 3,261.7493            | 1,073,914          | 1,071,226 / 99.75% | 13 / 236 / 189.97              | 528,737 / 98.47%          | 0 / 0%                            | 1,043,234 / 97.14%              | 92.63%              | 27,884 / 2.6%    |
| EPI_ISL_722892      | 1   | 93461086        | 3,125.4752       | 1,435.7568            | 459,420            | 457,441 / 99.57%   | 14 / 236 / 205.27              | 216,853 / 94.4%           | 0 / 0%                            | 429,941 / 93.58%                | 90.69%              | 21,845 / 4.75%   |
| EPI_ISL_722867      | 4   | 104330154       | 3,488.9527       | 1,597.5581            | 532,992            | 531,763 / 99.77%   | 15 / 236 / 196.82              | 263,848 / 99.01%          | 0 / 0%                            | 505,979 / 94.93%                | 87.38%              | 16,194 / 3.04%   |
| EPI_ISL_722900      | 0   | 94718246        | 3,167.5165       | 1,348.6075            | 530,196            | 525,557 / 99.13%   | 12 / 236 / 180.91              | 259,507 / 97.89%          | 0 / 0%                            | 498,977 / 94.11%                | 88.32%              | 17,338 / 3.27%   |
| EPI_ISL_722868      | 3   | 115110096       | 3,849.4498       | 1,727.2627            | 609,088            | 606,952 / 99.65%   | 17 / 236 / 190.18              | 302,549 / 99.34%          | 0 / 0%                            | 581,047 / 95.4%                 | 88.26%              | 16,048 / 2.63%   |
| EPI_ISL_653763      | 119 | 98560399        | 3,296.0037       | 2,972.0266            | 775,504            | 770,847 / 99.4%    | 18 / 136 / 128.66              | 372,284 / 96.01%          | 0 / 0%                            | 759,927 / 97.99%                | 56.25%              | 36,112 / 4.66%   |
| EPI_ISL_722854      | 1   | 98592150        | 3,297.0655       | 1,441.435             | 509,456            | 507,994 / 99.71%   | 14 / 236 / 194.88              | 252,015 / 98.93%          | 0 / 0%                            | 481,765 / 94.56%                | 87.51%              | 18,653 / 3.66%   |
| EPI_ISL_653764      | 60  | 29634196        | 991.0108         | 1,080.9075            | 248,534            | 247,191 / 99.46%   | 17 / 136 / 125.04              | 97,919 / 78.8%            | 0 / 0%                            | 237,622 / 95.61%                | 50.53%              | 33,966 / 13.67%  |
| EPI_ISL_722869      | 5   | 111133715       | 3,716.4738       | 1,646.411             | 591,514            | 588,569 / 99.5%    | 15 / 236 / 189.27              | 291,915 / 98.7%           | 0 / 0%                            | 562,346 / 95.07%                | 88.52%              | 14,859 / 2.51%   |
| EPI_ISL_722870      | 14  | 117187839       | 3,918.9325       | 1,731.8867            | 635,232            | 630,688 / 99.28%   | 16 / 236 / 186.35              | 312,226 / 98.3%           | 0 / 0%                            | 603,804 / 95.05%                | 89.65%              | 18,358 / 2.89%   |
| EPI_ISL_722871      | 12  | 77711842        | 2,598.7975       | 1,354.8182            | 384,472            | 383,533 / 99.76%   | 15 / 236 / 203.3               | 184,289 / 95.87%          | 0 / 0%                            | 357,644 / 93.02%                | 86.16%              | 13,153 / 3.42%   |
| EPI_ISL_653784      | 5   | 41918731        | 1,401.8236       | 6738664               | 200,124            | 199,667 / 99.77%   | 18 / 236 / 210.68              | 85,827 / 85.77%           | 0 / 0%                            | 175,887 / 87.89%                | 79.88%              | 5,834 / 2.92%    |
| EPI_ISL_653785      | 41  | 185358683       | 6,198.6651       | 4,399.9459            | 985,856            | 970,646 / 98.46%   | 11 / 236 / 191.37              | 480,937 / 97.57%          | 0 / 0%                            | 944,343 / 95.79%                | 89.67%              | 25,824 / 2.62%   |
| EPI_ISL_653786      | 1   | 113121362       | 3,782.9436       | 1,646.4922            | 565,044            | 563,486 / 99.72%   | 15 / 236 / 201.51              | 267,039 / 94.52%          | 0 / 0%                            | 535,692 / 94.81%                | 0.92                | 18,887 / 3.34%   |
| EPI_ISL_653765      | 3   | 210939116       | 7,054.1122       | 3,631.9819            | 1,211,263          | 1,204,669 / 99.46% | 92.55%                         | 21,979 / 1.81%            |                                   |                                 |                     |                  |
| EPI_ISL_653766      | 45  | 227702029       | 7,614.6885       | 5,739.4081            | 1,722,650          | 1,210,078 / 70.25% | 14 / 236 / 195.54              | 600,532 / 69.72%          | 0 / 0%                            | 1,184,072 / 68.74%              | 90%                 | 27,322 / 1.59%   |
| EPI_ISL_653767      | 0   | 377627310       | 12,628.4089      | 5,833.2701            | 2,041,206          | 2,035,397 / 99.72% | 13 / 236 / 185.89              | 1,007,098 / 98.68%        | 0 / 0%                            | 2,006,552 / 98.3%               | 96.08%              | 46,717 / 2.29%   |
| EPI_ISL_653768      | 8   | 207563712       | 6,941.2337       | 3,478.5351            | 1,273,837          | 1,267,375 / 99.49% | 93.56%                         | 20,972 / 1.65%            |                                   |                                 |                     |                  |
| EPI_ISL_653769      | 0   | 381264409       | 12,750.0388      | 5,840.0441            | 2,010,208          | 2,004,311 / 99.71% | 8 / 236 / 190.72               | 985,803 / 98.08%          | 0 / 0%                            | 1,975,309 / 98.26%              | 96.33%              | 48,873 / 2.43%   |
| EPI_ISL_653770      | 3   | 382971397       | 12,807.1229      | 7,195.0717            | 2,258,968          | 2,242,498 / 99.27% | 13 / 236 / 171.37              | 1,110,967 / 98.36%        | 0 / 0%                            | 2,213,697 / 98%                 | 95.98%              | 67,620 / 2.99%   |

13

14

15

16

17

|                |    |           |             |             |           |                    |                   |                    |        |                    |        |                |
|----------------|----|-----------|-------------|-------------|-----------|--------------------|-------------------|--------------------|--------|--------------------|--------|----------------|
| EPI_ISL_653771 | 41 | 321251918 | 10,743.1334 | 8,441.5249  | 1,780,828 | 1,721,239 / 96.65% | 9 / 236 / 186.97  | 854,142 / 95.93%   | 0 / 0% | 1,693,901 / 95.12% | 92.67% | 56,004 / 3.14% |
| EPI_ISL_653772 | 0  | 398470207 | 13,325.4258 | 7,574.4933  | 2,177,110 | 2,157,567 / 99.1%  | 14 / 236 / 185.16 | 1,071,884 / 98.47% | 0 / 0% | 2,129,122 / 97.8%  | 94.95% | 57,092 / 2.62% |
| EPI_ISL_653773 | 37 | 401275647 | 13,419.2438 | 6,760.6237  | 2,138,834 | 2,125,078 / 99.36% | 9 / 236 / 189.14  | 1,058,157 / 98.95% | 0 / 0% | 2,096,465 / 98.02% | 95.23% | 41,751 / 1.95% |
| EPI_ISL_653774 | 11 | 345501047 | 11,554.0597 | 5,792.4882  | 1,772,298 | 1,767,931 / 99.75% | 11 / 236 / 195.95 | 878,786 / 99.17%   | 0 / 0% | 1,739,432 / 98.15% | 94.8%  | 45,554 / 2.57% |
| EPI_ISL_653775 | 10 | 392787389 | 13,135.384  | 7,018.3014  | 2,046,278 | 2,017,516 / 98.59% | 14 / 236 / 195.11 | 1,003,628 / 98.09% | 0 / 0% | 1,989,190 / 97.21% | 94.46% | 46,771 / 2.29% |
| EPI_ISL_653776 | 1  | 340936676 | 11,401.4205 | 5,359.4676  | 1,953,986 | 1,947,836 / 99.69% | 13 / 236 / 175.48 | 967,875 / 99.07%   | 0 / 0% | 1,918,936 / 98.21% | 95.97% | 50,162 / 2.57% |
| EPI_ISL_653777 | 38 | 401303016 | 13,420.159  | 9,860.0356  | 2,157,328 | 2,132,453 / 98.85% | 9 / 236 / 188.54  | 1,058,957 / 98.17% | 0 / 0% | 2,104,662 / 97.56% | 93.88% | 58,965 / 2.73% |
| EPI_ISL_653778 | 9  | 408037365 | 13,645.3655 | 7,374.4161  | 2,128,542 | 2,123,053 / 99.74% | 14 / 236 / 192.67 | 1,055,508 / 99.18% | 0 / 0% | 2,094,457 / 98.4%  | 95.33% | 58,421 / 2.74% |
| EPI_ISL_653779 | 1  | 431259402 | 14,421.9444 | 7,005.0652  | 2,338,188 | 2,327,324 / 99.54% | 13 / 236 / 185.71 | 1,152,811 / 98.61% | 0 / 0% | 2,298,408 / 98.3%  | 96.11% | 52,421 / 2.24% |
| EPI_ISL_653780 | 9  | 359263463 | 12,014.295  | 6,265.3328  | 2,067,412 | 1,929,223 / 93.32% | 11 / 236 / 188.42 | 955,783 / 92.46%   | 0 / 0% | 1,900,899 / 91.95% | 94.83% | 39,831 / 1.93% |
| EPI_ISL_653781 | 0  | 333207763 | 11,142.9543 | 5,807.4258  | 1,852,416 | 1,759,026 / 94.96% | 12 / 236 / 190.87 | 875,451 / 94.52%   | 0 / 0% | 1,730,815 / 93.44% | 94.2%  | 38,980 / 2.1%  |
| EPI_ISL_653782 | 4  | 566436931 | 18,942.4784 | 9,487.5634  | 3,092,292 | 2,952,117 / 95.47% | 13 / 236 / 193.17 | 1,465,762 / 94.8%  | 0 / 0% | 2,923,134 / 94.53% | 96.63% | 70,423 / 2.28% |
| EPI_ISL_653783 | 41 | 513532404 | 17,173.2737 | 10,344.1165 | 2,944,684 | 2,670,074 / 90.67% | 11 / 236 / 194.89 | 1,327,822 / 90.18% | 0 / 0% | 2,641,479 / 89.7%  | 95.97% | 86,117 / 2.92% |
| EPI_ISL_653787 | 72 | 102990146 | 3,444.1409  | 3,651.8162  | 720,614   | 519,565 / 72.1%    | 15 / 236 / 196.6  | 257,297 / 71.41%   | 0 / 0% | 497,366 / 69.02%   | 82.22% | 18,583 / 2.58% |
| EPI_ISL_653788 | 60 | 90923529  | 3,040.6156  | 3,211.0785  | 713,182   | 468,294 / 65.66%   | 15 / 236 / 191.83 | 232,240 / 65.13%   | 0 / 0% | 447,153 / 62.7%    | 81.17% | 14,803 / 2.08% |
| EPI_ISL_653789 | 13 | 202599636 | 6,775.2278  | 3,533.8635  | 1,034,934 | 1,029,633 / 99.49% | 13 / 236 / 197.49 | 511,013 / 98.75%   | 0 / 0% | 1,002,295 / 96.85% | 91.24% | 30,672 / 2.96% |
| EPI_ISL_653790 | 41 | 186964266 | 6,252.3582  | 6,217.6596  | 1,158,394 | 991,976 / 85.63%   | 16 / 236 / 186.87 | 490,250 / 84.64%   | 0 / 0% | 967,336 / 83.51%   | 87.21% | 26,988 / 2.33% |
| EPI_ISL_653791 | 0  | 147129582 | 4,920.2281  | 2,727.2738  | 796,326   | 757,318 / 95.1%    | 14 / 236 / 195.31 | 372,594 / 93.58%   | 0 / 0% | 730,589 / 91.74%   | 89.7%  | 16,594 / 2.08% |
| EPI_ISL_653792 | 2  | 194092391 | 6,490.7331  | 3,336.3691  | 988,850   | 983,457 / 99.45%   | 14 / 236 / 198.11 | 488,620 / 98.83%   | 0 / 0% | 956,445 / 96.72%   | 90.64% | 29,256 / 2.96% |
| EPI_ISL_653793 | 5  | 231577761 | 7,744.2986  | 4,199.2333  | 1,202,426 | 1,195,863 / 99.45% | 15 / 236 / 194.16 | 595,519 / 99.05%   | 0 / 0% | 1,168,772 / 97.2%  | 91.3%  | 29,751 / 2.47% |
| EPI_ISL_653794 | 4  | 206708426 | 6,912.6317  | 3,790.0717  | 1,083,088 | 1,071,258 / 98.91% | 16 / 236 / 193.69 | 532,765 / 98.38%   | 0 / 0% | 1,044,258 / 96.41% | 90.8%  | 31,772 / 2.93% |
| EPI_ISL_653795 | 44 | 94231941  | 3,151.2538  | 3,327.8032  | 763,944   | 504,949 / 66.1%    | 15 / 236 / 184.53 | 250,280 / 65.52%   | 0 / 0% | 483,581 / 63.3%    | 82.17% | 14,577 / 1.91% |
| EPI_ISL_653796 | 5  | 225275997 | 7,533.5584  | 4,311.0311  | 1,202,190 | 1,172,836 / 97.56% | 13 / 236 / 192.62 | 582,992 / 96.99%   | 0 / 0% | 1,145,720 / 95.3%  | 91.04% | 27,319 / 2.27% |
| EPI_ISL_653797 | 3  | 178420406 | 5,966.639   | 2,973.8078  | 920,302   | 917,570 / 99.7%    | 12 / 236 / 195.19 | 456,017 / 99.1%    | 0 / 0% | 890,448 / 96.76%   | 90.53% | 25,854 / 2.81% |
| EPI_ISL_653798 | 12 | 173836669 | 5,813.3521  | 3,178.5933  | 883,140   | 880,681 / 99.72%   | 15 / 236 / 197.96 | 428,847 / 97.12%   | 0 / 0% | 853,180 / 96.61%   | 91.42% | 20,925 / 2.37% |
| EPI_ISL_653799 | 43 | 94466932  | 3,159.1122  | 3,413.526   | 843,774   | 510,350 / 60.48%   | 11 / 236 / 185.45 | 253,399 / 60.06%   | 0 / 0% | 488,514 / 57.9%    | 82.08% | 18,983 / 2.25% |
| EPI_ISL_653800 | 43 | 195411115 | 6,534.8331  | 3,756.865   | 1,070,690 | 1,049,094 / 97.98% | 16 / 236 / 186.57 | 523,151 / 97.72%   | 0 / 0% | 1,022,416 / 95.49% | 90.59% | 21,434 / 2%    |
| EPI_ISL_653801 | 50 | 127472486 | 4,262.8661  | 2,817.3238  | 927,120   | 681,514 / 73.51%   | 15 / 236 / 192.88 | 339,302 / 73.19%   | 0 / 0% | 656,635 / 70.83%   | 86.97% | 13,938 / 1.5%  |
| EPI_ISL_653802 | 3  | 156742315 | 5,241.692   | 2,479.4335  | 867,096   | 863,908 / 99.63%   | 15 / 236 / 181.9  | 427,968 / 98.71%   | 0 / 0% | 836,625 / 96.49%   | 91.03% | 19,096 / 2.2%  |
| EPI_ISL_653803 | 35 | 166455978 | 5,566.5311  | 3,896.6614  | 914,794   | 875,583 / 95.71%   | 12 / 236 / 190.25 | 433,742 / 94.83%   | 0 / 0% | 849,579 / 92.87%   | 88.73% | 22,997 / 2.51% |
| EPI_ISL_653804 | 1  | 178602163 | 5,972.7172  | 2,927.2662  | 914,436   | 909,853 / 99.5%    | 10 / 236 / 197    | 452,259 / 98.92%   | 0 / 0% | 882,810 / 96.54%   | 91.11% | 26,078 / 2.85% |
| EPI_ISL_653805 | 3  | 153119933 | 5,120.5542  | 2,541.1633  | 776,740   | 774,487 / 99.71%   | 16 / 236 / 198.46 | 381,449 / 98.22%   | 0 / 0% | 747,578 / 96.25%   | 89.67% | 22,336 / 2.88% |
| EPI_ISL_653806 | 59 | 127876358 | 5,781.2379  | 4,369.9229  | 941,788   | 893,207 / 94.84%   | 9 / 236 / 194.11  | 442,754 / 94.02%   | 0 / 0% | 867,263 / 92.09%   | 88.88% | 35,356 / 3.75% |
| EPI_ISL_653807 | 4  | 176018151 | 5,886.3041  | 2,947.6212  | 950,896   | 916,320 / 96.36%   | 15 / 236 / 193.14 | 451,626 / 94.99%   | 0 / 0% | 888,943 / 93.48%   | 91.2%  | 21,521 / 2.26% |
| EPI_ISL_653808 | 12 | 152333391 | 5,094.2511  | 2,492.6478  | 817,882   | 796,635 / 97.4%    | 14 / 236 / 192.12 | 394,758 / 96.53%   | 0 / 0% | 770,008 / 94.15%   | 89.59% | 16,212 / 1.98% |
| EPI_ISL_653809 | 30 | 161853647 | 5,412.6224  | 4,133.897   | 1,034,606 | 931,712 / 90.39%   | 14 / 236 / 197.69 | 413,704 / 79.97%   | 0 / 0% | 806,960 / 78%      | 87.56% | 19,440 / 1.88% |
| EPI_ISL_653810 | 0  | 185628983 | 6,207.7043  | 3,211.2489  | 1,027,684 | 946,031 / 92.05%   | 12 / 236 / 198.2  | 469,612 / 91.39%   | 0 / 0% | 919,269 / 89.45%   | 90.33% | 21,580 / 2.1%  |
| EPI_ISL_653811 | 42 | 223182398 | 7,463.5454  | 3,958.3562  | 1,217,172 | 1,139,852 / 93.65% | 14 / 236 / 197.35 | 567,474 / 93.24%   | 0 / 0% | 1,113,031 / 91.44% | 91.44% | 24,243 / 1.99% |
| EPI_ISL_653812 | 2  | 163465305 | 5,466.5186  | 3,084.7736  | 811,36    | 802,301 / 98.88%   | 16 / 236 / 204.3  | 387,309 / 95.47%   | 0 / 0% | 774,492 / 95.46%   | 92.45% | 20,630 / 2.54% |
| EPI_ISL_653813 | 1  | 169229355 | 5,659.2768  | 3,049.946   | 868,71    | 866,385 / 99.73%   | 14 / 236 / 196.22 | 424,283 / 97.68%   | 0 / 0% | 838,938 / 96.57%   | 91.38% | 28,548 / 3.29% |
| EPI_ISL_653814 | 4  | 232553605 | 7,776.9322  | 4,370.7628  | 1,200,774 | 1,183,347 / 98.55% | 9 / 236 / 196.91  | 573,540 / 95.53%   | 0 / 0% | 1,155,318 / 96.21% | 93.22% | 27,726 / 2.31% |
| EPI_ISL_653815 | 8  | 183917470 | 6,150.4688  | 4,028.5239  | 956,078   | 934,304 / 97.72%   | 13 / 236 / 197.28 | 464,898 / 97.25%   | 0 / 0% | 908,296 / 95%      | 89.43% | 23,858 / 2.5%  |
| EPI_ISL_653816 | 4  | 201964274 | 6,753.9803  | 3,278.347   | 1,092,058 | 1,088,097 / 99.64% | 15 / 236 / 186.07 | 542,449 / 99.34%   | 0 / 0% | 1,060,790 / 97.14% | 91.94% | 21,801 / 2.2%  |
| EPI_ISL_653817 | 14 | 188460804 | 6,302.4046  | 3,696.2744  | 960,69    | 951,663 / 99.06%   | 12 / 236 / 198.6  | 473,033 / 98.48%   | 0 / 0% | 925,173 / 96.3%    | 89.67% | 23,918 / 2.49% |
| EPI_ISL_653818 | 1  | 212661910 | 7,111.7249  | 3,478.3444  | 1,107,124 | 1,103,820 / 99.7%  | 11 / 236 / 193.3  | 548,739 / 99.13%   | 0 / 0% | 1,076,222 / 97.21% | 92.36% | 28,243 / 2.55% |
| EPI_ISL_653819 | 2  | 152618103 | 5,103.7723  | 2,679.231   | 821,39    | 818,491 / 99.65%   | 13 / 236 / 187.21 | 398,627 / 97.06%   | 0 / 0% | 790,746 / 96.27%   | 91.76% | 25,401 / 3.09% |
| EPI_ISL_653820 | 2  | 144640811 | 4,837       | 2,373.5891  | 746,604   | 744,369 / 99.7%    | 16 / 236 / 194.94 | 367,170 / 98.36%   | 0 / 0% | 717,444 / 96.09%   | 89.98% | 20,880 / 2.8%  |
| EPI_ISL_653821 | 15 | 203237316 | 6,796.5527  | 3,130.4079  | 1,020,550 | 1,015,923 / 99.55% | 13 / 236 / 200.63 | 485,677 / 95.18%   | 0 / 0% | 987,621 / 96.77%   | 93.6%  | 29,544 / 2.89% |
| EPI_ISL_653822 | 1  | 237053727 | 7,927.4229  | 3,894.7764  | 1,245,402 | 1,239,794 / 99.55% | 13 / 236 / 191.79 | 615,469 / 98.84%   | 0 / 0% | 1,212,121 / 97.33% | 92.57% | 29,038 / 2.33% |
| EPI_ISL_722908 | 0  | 46993027  | 1,571.5215  | 6059739     | 251,39    | 250,336 / 99.58%   | 12 / 236 / 188.58 | 112,102 / 89.19%   | 0 / 0% | 224,549 / 89.32%   | 84.43% | 9,583 / 3.81%  |
| EPI_ISL_722911 | 3  | 81762559  | 2,734.2594  | 1,148.1314  | 416,908   | 415,384 / 99.63%   | 7 / 236 / 197.91  | 198,307 / 95.13%   | 0 / 0% | 388,068 / 93.08%   | 89.37% | 19,165 / 4.6%  |
| EPI_ISL_722893 | 1  | 82178432  | 2,748.1668  | 1,053.4511  | 425,81    | 424,289 / 99.64%   | 13 / 236 / 194.8  | 203,032 / 95.36%   | 0 / 0% | 396,914 / 93.21%   | 89.67% | 18,752 / 4.4%  |
| EPI_ISL_722894 | 25 | 71398834  | 2,387.6813  | 8616725     | 369,48    | 368,030 / 99.61%   | 16 / 236 / 194.5  | 175,378 / 94.93%   | 0 / 0% | 341,620 / 92.46%   | 87.33% | 8,451 / 2.29%  |
| EPI_ISL_722909 | 0  | 103563543 | 3,463.3162  | 1,191.2425  | 573,862   | 572,653 / 99.79%   | 13 / 236 / 181.84 | 282,078 / 98.31%   | 0 / 0% | 544,609 / 94.9%    | 92.5%  | 20,905 / 3.64% |
| EPI_ISL_722910 | 12 | 100417550 | 3,358.1096  | 1,403.0645  | 519,55    | 516,657 / 99.44%   | 15 / 236 / 194.92 | 252,570 / 97.23%   | 0 / 0% | 489,756 / 94.27%   | 89.35% | 14,841 / 2.86% |
| EPI_ISL_722901 | 11 | 76153734  | 2,546.6921  | 1,178.8716  | 399,51    | 397,904 / 99.6%    | 12 / 236 / 192.24 | 198,112 / 99.18%   | 0 / 0% | 373,240 / 93.42%   | 84.65% | 13,368 / 3.35% |
| EPI_ISL_722873 | 5  | 87815683  | 2,936.6847  | 1,465.4578  | 493,936   | 491,994 / 99.61%   | 13 / 236 / 179.01 | 241,704 / 97.87%   | 0 / 0% | 465,664 / 94.28%   | 88.32% | 13,398 / 2.71% |
| EPI_ISL_722874 | 3  | 118924324 | 3,977.0031  | 2,002.1873  | 619,914   | 614,126 / 99.07%   | 8 / 236 / 194.98  | 305,195 / 98.46%   | 0 / 0% | 587,736 / 94.81%   | 88.62% | 32,982 / 5.32% |
| EPI_ISL_722875 | 2  | 101967385 | 3,409.9383  | 1,636.9946  | 523,034   | 521,257 / 99.66%   | 16 / 236 / 196.37 | 257,615 / 98.51%   | 0 / 0% | 495,045 / 94.65%   | 87.96% | 18,065 / 3.45% |
| EPI_ISL_722876 | 12 | 85409984  | 2,856.2346  | 1,462.3482  | 460,046   | 458,307 / 99.62%   | 14 / 236 / 187.18 | 225,127 / 97.87%   | 0 / 0% | 432,008 / 93.91%   | 87.74% | 16,689 / 3.63% |
| EPI_ISL_722913 | 3  | 131611789 | 3,799.3442  | 2,091.9309  | 600,696   | 592,390 / 98.62%   | 14 / 236 / 192.15 | 295,335 / 98.33%   | 0 / 0% | 567,590 / 94.49%   | 86.55% | 12,522 / 2.08% |
| EPI_ISL_722914 | 9  | 97904918  | 3,274.0835  | 1,664.8185  | 514,234   | 509,330 / 99.05%   | 15 / 236 / 192.73 | 253,777 / 98.7%    | 0 / 0% | 484,494 / 94.22%   | 85.86% | 13,485 / 2.62% |
| EPI_ISL_722902 | 17 | 63807411  | 2,133.813   | 1,243.8182  | 339,378   | 336,629 / 99.19%   | 13 / 236 / 190.32 | 167,755 / 98.86%   | 0 / 0% | 313,416 / 92.      |        |                |

|                |     |            |             |             |            |                     |                   |                    |        |                    |        |                 |
|----------------|-----|------------|-------------|-------------|------------|---------------------|-------------------|--------------------|--------|--------------------|--------|-----------------|
| EPI_ISL_722882 | 5   | 105151267  | 3,516.412   | 1,607.9531  | 551,620    | 544,963 / 98.79%    | 17 / 236 / 193.55 | 271,259 / 98.35%   | 0 / 0% | 519,267 / 94.13%   | 87.03% | 14,937 / 2.71%  |
| EPI_ISL_722883 | 3   | 109408538  | 3,658.7813  | 1,619.5892  | 562,204    | 560,635 / 99.72%    | 11 / 236 / 195.93 | 277,234 / 98.62%   | 0 / 0% | 534,311 / 95.04%   | 88.8%  | 19,711 / 3.51%  |
| EPI_ISL_722907 | 17  | 109308073  | 3,655.4216  | 1,588.1097  | 584,216    | 581,982 / 99.62%    | 8 / 236 / 188.58  | 289,983 / 99.27%   | 0 / 0% | 555,915 / 95.16%   | 87.89% | 18,761 / 3.21%  |
| EPI_ISL_722884 | 25  | 116197033  | 3,885.7985  | 1,804.9558  | 612,636    | 604,931 / 98.74%    | 6 / 236 / 193.37  | 300,477 / 98.09%   | 0 / 0% | 578,316 / 94.4%    | 89%    | 30,193 / 4.93%  |
| EPI_ISL_722885 | 11  | 109445130  | 3,660.005   | 1,486.5758  | 586,942    | 585,471 / 99.75%    | 3 / 236 / 187.34  | 289,197 / 98.54%   | 0 / 0% | 558,949 / 95.23%   | 89.05% | 14,019 / 2.39%  |
| EPI_ISL_722886 | 26  | 103126245  | 3,448.6923  | 1,589.1751  | 567,852    | 565,366 / 99.56%    | 14 / 236 / 182.79 | 281,846 / 99.27%   | 0 / 0% | 539,707 / 95.04%   | 87.16% | 13,076 / 2.3%   |
| EPI_ISL_722920 | 41  | 116370310  | 3,891.5932  | 2,028.6284  | 605,062    | 594,545 / 98.26%    | 16 / 236 / 196.21 | 295,829 / 97.78%   | 0 / 0% | 569,345 / 94.1%    | 86.62% | 16,328 / 2.7%   |
| EPI_ISL_722921 | 31  | 103972868  | 3,477.0046  | 3,151.653   | 630,424    | 579,192 / 91.87%    | 13 / 236 / 179.15 | 287,993 / 91.36%   | 0 / 0% | 555,742 / 88.15%   | 84.63% | 19,363 / 3.07%  |
| EPI_ISL_722886 | 2   | 122648866  | 4,101.5572  | 1,823.1545  | 632,696    | 631,148 / 99.76%    | 9 / 236 / 195.07  | 309,270 / 97.76%   | 0 / 0% | 604,274 / 95.51%   | 89.7%  | 19,477 / 3.08%  |
| EPI_ISL_722888 | 3   | 131503289  | 4,397.6621  | 2,272.1735  | 693,496    | 689,923 / 99.48%    | 13 / 236 / 191.26 | 343,251 / 98.99%   | 0 / 0% | 663,645 / 95.7%    | 89.12% | 21,717 / 3.13%  |
| EPI_ISL_722889 | 55  | 68241964   | 2,282.111   | 2,201.3779  | 440,722    | 347,656 / 78.88%    | 16 / 236 / 195.69 | 173,093 / 78.55%   | 0 / 0% | 327,158 / 74.23%   | 80.46% | 12,927 / 2.93%  |
| EPI_ISL_722890 | 16  | 109001931  | 3,645.1838  | 2,067.9934  | 578,846    | 577,570 / 99.78%    | 13 / 236 / 189.2  | 287,959 / 99.49%   | 0 / 0% | 552,712 / 95.49%   | 86.21% | 13,826 / 2.39%  |
| EPI_ISL_722922 | 29  | 104443451  | 3,492.7416  | 1,923.1198  | 604,842    | 591,344 / 97.77%    | 14 / 236 / 176.95 | 293,904 / 97.18%   | 0 / 0% | 565,503 / 93.5%    | 87.84% | 17,155 / 2.84%  |
| EPI_ISL_722923 | 41  | 98273058   | 3,286.3946  | 1,587.6187  | 573,296    | 565,461 / 98.63%    | 11 / 236 / 174.49 | 278,913 / 97.3%    | 0 / 0% | 539,154 / 94.04%   | 88.59% | 17,262 / 3.01%  |
| EPI_ISL_722924 | 31  | 207710315  | 6,946.1363  | 5,117.2493  | 1,147,770  | 1,054,006 / 91.83%  | 15 / 236 / 197.18 | 524,943 / 91.47%   | 0 / 0% | 1,028,213 / 89.58% | 88.71% | 32,105 / 2.8%   |
| EPI_ISL_722925 | 37  | 129373749  | 4,326.4471  | 3,378.2918  | 688,978    | 675,437 / 98.03%    | 15 / 236 / 191.42 | 336,989 / 97.82%   | 0 / 0% | 651,264 / 94.53%   | 86.39% | 18,612 / 2.7%   |
| EPI_ISL_722891 | 46  | 128220450  | 4,287.8791  | 3,437.3381  | 807,286    | 689,419 / 85.4%     | 15 / 236 / 185.93 | 343,822 / 85.18%   | 0 / 0% | 665,275 / 82.41%   | 86.46% | 20,912 / 2.59%  |
| EPI_ISL_745193 | 0   | 2011981588 | 67,283.6033 | 34,434.6709 | 10,029,230 | 10,011,111 / 99.82% | 5 / 251 / 201.18  | 4,826,108 / 96.24% | 0 / 0% | 9,981,727 / 99.53% | 98.67% | 418,949 / 4.18% |
| EPI_ISL_745192 | 0   | 2446589552 | 81,817.5284 | 38,308.6986 | 12,244,876 | 12,225,116 / 99.84% | 5 / 251 / 200.3   | 6,061,070 / 99%    | 0 / 0% | 12,196,014 / 99.6% | 98.49% | 378,777 / 3.09% |
| EPI_ISL_794746 | 37  | 128199465  | 4,287.1774  | 4,364.546   | 676,23     | 653,607 / 96.65%    | 8 / 251 / 195.14  | 323,148 / 95.57%   | 0 / 0% | 634,155 / 93.78%   | 87.89% | 23,397 / 3.46%  |
| EPI_ISL_794747 | 10  | 127464866  | 4,262.6113  | 1,923.341   | 695,63     | 694,229 / 99.8%     | 5 / 251 / 183.82  | 343,738 / 98.83%   | 0 / 0% | 671,306 / 96.5%    | 89.81% | 28,397 / 4.08%  |
| EPI_ISL_794748 | 5   | 110612393  | 3,699.04    | 1,728.9168  | 570,884    | 570,073 / 99.86%    | 5 / 251 / 194.27  | 283,038 / 99.16%   | 0 / 0% | 548,456 / 96.07%   | 89.14% | 17,902 / 3.14%  |
| EPI_ISL_794749 | 3   | 115186781  | 3,852.0142  | 1,702.4226  | 569,132    | 568,528 / 99.89%    | 8 / 251 / 203.18  | 277,386 / 97.48%   | 0 / 0% | 544,125 / 95.61%   | 89.21% | 21,209 / 3.73%  |
| EPI_ISL_794750 | 3   | 132348222  | 4,425.9179  | 2,120.68    | 686,904    | 685,592 / 99.81%    | 5 / 251 / 193.26  | 336,988 / 98.12%   | 0 / 0% | 661,492 / 96.3%    | 89.82% | 30,992 / 4.51%  |
| EPI_ISL_794751 | 2   | 112371803  | 3,757.8772  | 1,853.6234  | 585,444    | 584,394 / 99.82%    | 5 / 251 / 192.51  | 286,838 / 97.99%   | 0 / 0% | 561,078 / 95.84%   | 88.92% | 24,584 / 4.2%   |
| EPI_ISL_794752 | 44  | 80513489   | 2,692.4887  | 2,288.7892  | 421,672    | 394,556 / 93.57%    | 5 / 251 / 200.23  | 196,050 / 92.97%   | 0 / 0% | 377,050 / 98.42%   | 86.83% | 12,377 / 2.94%  |
| EPI_ISL_794753 | 10  | 128038498  | 4,281.7944  | 3,927.0888  | 651,166    | 628,852 / 96.57%    | 5 / 251 / 201.93  | 311,591 / 95.7%    | 0 / 0% | 609,468 / 93.6%    | 88.35% | 19,992 / 3.07%  |
| EPI_ISL_794754 | 0   | 100102098  | 3,347.5604  | 1,212.6929  | 465,456    | 464,997 / 99.9%     | 8 / 251 / 215.67  | 221,532 / 95.19%   | 0 / 0% | 440,286 / 94.59%   | 87.77% | 14,388 / 3.09%  |
| EPI_ISL_794755 | 1   | 120378267  | 4,025.6251  | 1,734.9336  | 606,454    | 605,867 / 99.9%     | 8 / 251 / 199.26  | 298,114 / 98.31%   | 0 / 0% | 582,112 / 95.99%   | 89.04% | 22,753 / 3.75%  |
| EPI_ISL_794756 | 36  | 130245228  | 4,355.5907  | 3,114.5856  | 724,098    | 718,794 / 99.27%    | 5 / 251 / 181.25  | 356,592 / 98.49%   | 0 / 0% | 697,477 / 96.32%   | 90.07% | 24,646 / 3.4%   |
| EPI_ISL_794757 | 46  | 96238662   | 3,218.3614  | 2,977.3646  | 534,446    | 514,026 / 96.18%    | 5 / 251 / 186.07  | 255,350 / 95.56%   | 0 / 0% | 495,458 / 92.7%    | 88.61% | 17,677 / 3.31%  |
| EPI_ISL_794758 | 45  | 121011027  | 4,046.7855  | 2,844.0336  | 664,068    | 657,145 / 98.96%    | 5 / 251 / 183.93  | 325,682 / 98.09%   | 0 / 0% | 636,069 / 95.78%   | 89.83% | 23,775 / 3.58%  |
| EPI_ISL_794759 | 0   | 107406535  | 3,591.8314  | 1,270.8662  | 509,182    | 508,406 / 99.85%    | 5 / 251 / 211.89  | 241,187 / 94.74%   | 0 / 0% | 483,284 / 94.91%   | 88.61% | 21,854 / 4.29%  |
| EPI_ISL_794760 | 0   | 110331693  | 3,689.653   | 1,747.7832  | 543,294    | 541,859 / 99.74%    | 5 / 251 / 204.26  | 262,052 / 96.47%   | 0 / 0% | 517,975 / 95.34%   | 88.05% | 32,716 / 6.02%  |
| EPI_ISL_794761 | 9   | 119547111  | 3,997.83    | 1,907.8919  | 586,146    | 584,961 / 99.8%     | 8 / 251 / 204.92  | 287,373 / 98.06%   | 0 / 0% | 562,163 / 95.91%   | 88.64% | 23,341 / 3.98%  |
| EPI_ISL_794762 | 2   | 116249001  | 3,887.5364  | 1,766.7421  | 622,122    | 620,583 / 99.75%    | 5 / 251 / 187.79  | 302,175 / 97.14%   | 0 / 0% | 596,375 / 95.86%   | 89.17% | 28,077 / 4.51%  |
| EPI_ISL_876800 | 7   | 141415456  | 4,729.1394  | 2,253.6088  | 733,798    | 732,697 / 99.62%    | 5 / 251 / 193.82  | 362,991 / 98.93%   | 0 / 0% | 708,002 / 96.48%   | 90.58% | 22,331 / 3.04%  |
| EPI_ISL_876801 | 0   | 62794959   | 2,099.9552  | 9398543     | 306,238    | 305,761 / 99.84%    | 11 / 251 / 205.79 | 149,202 / 97.44%   | 0 / 0% | 283,997 / 92.74%   | 84.38% | 12,825 / 4.19%  |
| EPI_ISL_876802 | 11  | 83002574   | 2,775.7273  | 1,211.5646  | 448,286    | 447,348 / 99.79%    | 10 / 251 / 185.84 | 220,970 / 98.58%   | 0 / 0% | 425,760 / 94.98%   | 87.91% | 16,649 / 3.71%  |
| EPI_ISL_876803 | 11  | 60515903   | 2,023.7402  | 9017734     | 307,956    | 307,486 / 99.85%    | 15 / 251 / 197.18 | 152,503 / 99.04%   | 0 / 0% | 288,122 / 93.56%   | 86.36% | 10,182 / 3.31%  |
| EPI_ISL_794763 | 11  | 123218346  | 4,120.6015  | 2,265.169   | 622,51     | 613,621 / 98.57%    | 7 / 251 / 200.58  | 299,293 / 96.16%   | 0 / 0% | 590,450 / 94.85%   | 87.92% | 38,263 / 6.15%  |
| EPI_ISL_794764 | 1   | 124888464  | 4,176.4527  | 1,999.2059  | 637,91     | 636,321 / 99.75%    | 5 / 251 / 196.75  | 310,704 / 97.41%   | 0 / 0% | 612,521 / 96.02%   | 88.84% | 35,775 / 5.61%  |
| EPI_ISL_794765 | 4   | 118544954  | 3,964.3164  | 2,219.9182  | 614,376    | 606,256 / 99%       | 5 / 251 / 195.23  | 301,963 / 98.3%    | 0 / 0% | 586,547 / 95.47%   | 89.64% | 24,561 / 4%     |
| EPI_ISL_794766 | 11  | 155076751  | 5,185.9931  | 2,536.4867  | 785,56     | 780,202 / 99.32%    | 5 / 251 / 199.08  | 386,849 / 98.49%   | 0 / 0% | 757,025 / 96.37%   | 90.4%  | 28,707 / 3.65%  |
| EPI_ISL_794767 | 13  | 112038571  | 3,746.7335  | 1,711.1066  | 556,978    | 556,049 / 99.83%    | 6 / 251 / 202.15  | 275,372 / 98.88%   | 0 / 0% | 533,908 / 95.86%   | 88.92% | 22,636 / 4.06%  |
| EPI_ISL_794768 | 0   | 72645615   | 2,429.3755  | 1,177.6498  | 356,404    | 355,912 / 99.86%    | 5 / 251 / 204.85  | 170,895 / 95.9%    | 0 / 0% | 333,725 / 93.64%   | 86.03% | 14,344 / 4.02%  |
| EPI_ISL_794769 | 4   | 91427817   | 3,057.4798  | 1,536.2964  | 449,098    | 447,811 / 99.71%    | 8 / 251 / 204.49  | 215,470 / 95.96%   | 0 / 0% | 424,647 / 94.56%   | 86.57% | 23,107 / 5.15%  |
| EPI_ISL_794770 | 7   | 136244399  | 4,556.2117  | 2,137.6577  | 701,422    | 696,718 / 99.33%    | 5 / 251 / 195.73  | 339,371 / 96.77%   | 0 / 0% | 672,276 / 95.84%   | 89.31% | 43,116 / 6.02%  |
| EPI_ISL_876804 | 2   | 75530952   | 2,525.8654  | 1,193.4897  | 382,264    | 381,332 / 99.76%    | 9 / 251 / 198.5   | 183,685 / 96.1%    | 0 / 0% | 359,391 / 94.02%   | 86.09% | 18,468 / 4.83%  |
| EPI_ISL_876805 | 35  | 94442437   | 3,158.293   | 1,446.8679  | 531,888    | 530,341 / 99.71%    | 8 / 251 / 178.41  | 261,465 / 98.32%   | 0 / 0% | 507,874 / 95.49%   | 88.77% | 21,646 / 4.07%  |
| EPI_ISL_876806 | 10  | 80137806   | 2,679.901   | 1,250.9622  | 414,626    | 412,697 / 99.53%    | 7 / 251 / 194.31  | 199,183 / 96.08%   | 0 / 0% | 389,670 / 93.98%   | 86.24% | 27,337 / 6.59%  |
| EPI_ISL_876807 | 172 | 79374708   | 2,654.4062  | 1,260.3413  | 405,078    | 403,905 / 99.71%    | 10 / 251 / 197.27 | 196,319 / 96.93%   | 0 / 0% | 381,390 / 94.15%   | 86.39% | 24,006 / 5.93%  |
| EPI_ISL_794771 | 26  | 116373089  | 4,403.3404  | 1,998.6609  | 675,376    | 672,243 / 99.54%    | 5 / 251 / 195.96  | 332,172 / 98.37%   | 0 / 0% | 649,123 / 96.11%   | 89.39% | 26,447 / 3.92%  |
| EPI_ISL_794772 | 16  | 126342164  | 4,225.0665  | 2,320.4968  | 679,06     | 677,775 / 99.81%    | 7 / 251 / 186.59  | 334,917 / 98.64%   | 0 / 0% | 655,159 / 96.48%   | 89.78% | 24,194 / 3.56%  |
| EPI_ISL_794773 | 2   | 115367462  | 3,858.0564  | 1,971.0507  | 561,63     | 560,745 / 99.84%    | 5 / 251 / 206.2   | 271,754 / 96.77%   | 0 / 0% | 537,020 / 95.62%   | 88.03% | 23,555 / 4.19%  |
| EPI_ISL_794774 | 0   | 112545581  | 3,763.6886  | 1,921.4665  | 544,64     | 542,789 / 99.66%    | 5 / 251 / 207.6   | 256,659 / 94.25%   | 0 / 0% | 518,547 / 95.21%   | 88.05% | 29,441 / 5.41%  |
| EPI_ISL_794775 | 0   | 77950952   | 2,606.7937  | 1,217.0779  | 396,726    | 396,158 / 99.86%    | 5 / 251 / 197.22  | 195,606 / 98.61%   | 0 / 0% | 375,238 / 94.58%   | 87.22% | 14,593 / 3.68%  |
| EPI_ISL_794776 | 2   | 111689478  | 3,735.0593  | 2,042.101   | 581,746    | 580,565 / 99.8%     | 7 / 251 / 192.84  | 280,972 / 96.6%    | 0 / 0% | 557,068 / 95.76%   | 88.74% | 26,482 / 4.55%  |
| EPI_ISL_794777 | 0   | 103154555  | 3,449.639   | 1,872.2872  | 499,114    | 497,557 / 99.69%    | 6 / 251 / 207.6   | 232,783 / 93.28%   | 0 / 0% | 473,900 / 94.95%   | 87.48% | 25,738 / 5.16%  |
| EPI_ISL_794778 | 0   | 142672709  | 4,771.1838  | 2,424.8573  | 701,984    | 701,196 / 99.89%    | 5 / 251 / 204.08  | 341,576 / 97.32%   | 0 / 0% | 677,131 / 96.46%   | 89.72% | 27,965 / 3.98%  |
| EPI_ISL_794779 | 9   | 115871423  | 3,874.9096  | 2,114.1785  | 567,326    | 566,559 / 99.86%    | 5 / 251 / 204.73  | 279,853 / 98.66%   | 0 / 0% | 544,438 / 95.97%   | 88.43% | 17,612 / 3.1%   |
| EPI_ISL_794780 | 3   | 126680350  | 4,236.3759  | 1,976.8749  | 625,084    | 624,312 / 99.88%    | 5 / 251 / 203.29  | 308,557 / 98.72%   | 0 / 0% | 601,773 / 96.27%   | 88.95% | 20,856 / 3.34%  |
| EPI_ISL_794781 | 11  | 109272609  | 3,654.2357  | 1,711.2774  | 530,66     | 529,389 / 99.76%    | 8 / 251 / 206.64  | 254,775 / 96.02%   | 0 / 0% | 505,290 / 95.22%   | 87.92% | 23,812 / 4.49%  |
| EPI_ISL_794782 | 12  | 118906676  | 3,976.4129  | 1,731.3692  |            |                     |                   |                    |        |                    |        |                 |

|                  |    |           |            |            |         |                  |                   |                  |        |                  |        |                |
|------------------|----|-----------|------------|------------|---------|------------------|-------------------|------------------|--------|------------------|--------|----------------|
| EPI_ISL_794796   | 0  | 65336866  | 2,184.9602 | 1,302.5088 | 334,384 | 333,789 / 99.82% | 5 / 251 / 196.4   | 151,773 / 90.78% | 0 / 0% | 312,239 / 93.38% | 85.49% | 14,446 / 4.32% |
| EPI_ISL_794797   | 2  | 96301490  | 3,220.4625 | 1,608.3298 | 473,222 | 472,456 / 99.84% | 5 / 251 / 204.18  | 230,208 / 97.29% | 0 / 0% | 450,055 / 95.1%  | 87.32% | 17,720 / 3.74% |
| EPI_ISL_794798   | 10 | 96039693  | 3,211.7076 | 1,451.4985 | 543,642 | 542,519 / 99.79% | 5 / 251 / 177.23  | 268,623 / 98.82% | 0 / 0% | 520,240 / 95.7%  | 89.02% | 19,355 / 3.56% |
| EPI_ISL_794799   | 0  | 85443163  | 2,857.3442 | 1,411.3961 | 425,222 | 424,622 / 99.86% | 5 / 251 / 201.6   | 208,427 / 98.03% | 0 / 0% | 403,051 / 94.79% | 86.83% | 17,469 / 4.11% |
| EPI_ISL_794800   | 16 | 88643373  | 2,964.3639 | 1,342.1671 | 444,79  | 443,764 / 99.77% | 5 / 251 / 199.92  | 218,640 / 98.31% | 0 / 0% | 422,211 / 94.92% | 87.66% | 18,496 / 4.16% |
| EPI_ISL_794801   | 4  | 105983428 | 3,544.2406 | 1,663.1775 | 526,554 | 525,638 / 99.83% | 7 / 251 / 201.91  | 259,096 / 98.41% | 0 / 0% | 503,646 / 95.65% | 88.03% | 22,034 / 4.18% |
| EPI_ISL_794802   | 4  | 80005869  | 2,675.5131 | 1,375.6334 | 394,742 | 394,106 / 99.84% | 5 / 251 / 203.33  | 190,555 / 96.55% | 0 / 0% | 371,881 / 94.21% | 86.37% | 14,800 / 3.75% |
| EPI_ISL_794803   | 16 | 117229652 | 3,920.3308 | 1,802.4557 | 600,972 | 596,693 / 99.29% | 5 / 251 / 196.48  | 295,449 / 98.32% | 0 / 0% | 574,309 / 95.56% | 89.03% | 19,899 / 3.31% |
| EPI_ISL_794804   | 10 | 97454234  | 3,259.0119 | 1,503.9186 | 500,934 | 499,911 / 99.8%  | 9 / 251 / 195.15  | 246,918 / 98.58% | 0 / 0% | 478,177 / 95.46% | 88.27% | 20,288 / 4.05% |
| EPI_ISL_794805   | 36 | 107069611 | 3,580.5642 | 1,754.111  | 547,532 | 545,407 / 99.61% | 5 / 251 / 196.39  | 271,094 / 99.02% | 0 / 0% | 524,281 / 95.75% | 89.3%  | 16,113 / 2.94% |
| EPI_ISL_794806   | 6  | 77221229  | 2,582.3907 | 1,013.1293 | 375,398 | 374,864 / 99.86% | 7 / 251 / 206.2   | 179,581 / 95.67% | 0 / 0% | 351,767 / 93.71% | 86.07% | 12,426 / 3.31% |
| EPI_ISL_794807   | 7  | 106810071 | 3,571.8848 | 1,669.4096 | 551,082 | 549,723 / 99.75% | 5 / 251 / 194.52  | 270,118 / 98.03% | 0 / 0% | 526,880 / 95.61% | 88.21% | 23,295 / 4.23% |
| EPI_ISL_794808   | 44 | 111824322 | 3,739.5687 | 1,737.782  | 595,99  | 594,191 / 99.7%  | 5 / 251 / 188.31  | 293,164 / 98.38% | 0 / 0% | 571,814 / 95.94% | 89.36% | 23,280 / 3.91% |
| EPI_ISL_794809   | 2  | 39806155  | 1,331.176  | 6245717    | 427,186 | 426,319 / 99.8%  | 5 / 251 / 184.62  | 210,065 / 98.35% | 0 / 0% | 404,879 / 94.78% | 87.38% | 17,946 / 4.2%  |
| EPI_ISL_794810   | 1  | 66779117  | 2,233.1912 | 9942675    | 322,76  | 322,200 / 99.83% | 6 / 251 / 207.58  | 154,263 / 95.59% | 0 / 0% | 300,033 / 92.96% | 84.8%  | 12,410 / 3.84% |
| EPI_ISL_794811   | 2  | 74485142  | 2,490.892  | 1,253.5352 | 361,874 | 361,033 / 99.77% | 5 / 251 / 206.59  | 172,826 / 95.52% | 0 / 0% | 338,403 / 93.51% | 84.98% | 17,341 / 4.79% |
| EPI_ISL_794812   | 1  | 108957249 | 3,643.6896 | 1,971.7603 | 546,56  | 545,848 / 99.87% | 7 / 251 / 200.15  | 264,406 / 96.75% | 0 / 0% | 522,547 / 95.61% | 88.37% | 21,794 / 3.99% |
| EPI_ISL_794813   | 4  | 95380175  | 3,189.6524 | 1,489.1008 | 477,618 | 475,923 / 99.65% | 10 / 251 / 200.75 | 234,171 / 98.06% | 0 / 0% | 453,885 / 95.03% | 87.92% | 22,831 / 4.78% |
| EPI_ISL_794814   | 4  | 86701964  | 2,899.4403 | 1,326.2454 | 431,922 | 430,728 / 99.72% | 6 / 251 / 201.59  | 211,709 / 98.03% | 0 / 0% | 409,001 / 94.69% | 86.73% | 20,730 / 4.8%  |
| EPI_ISL_794815   | 25 | 102828384 | 3,438.7314 | 1,667.914  | 537,894 | 536,355 / 99.71% | 7 / 251 / 191.87  | 264,549 / 98.36% | 0 / 0% | 514,081 / 95.57% | 88.72% | 20,740 / 3.86% |
| EPI_ISL_794816   | 9  | 130048288 | 4,349.0047 | 2,043.9621 | 662,756 | 661,635 / 99.83% | 8 / 251 / 196.79  | 327,185 / 98.73% | 0 / 0% | 639,038 / 96.42% | 89.53% | 21,480 / 3.24% |
| EPI_ISL_794817   | 4  | 77056828  | 2,576.8929 | 1,259.3559 | 396,872 | 394,482 / 99.4%  | 8 / 251 / 195.2   | 184,880 / 93.17% | 0 / 0% | 370,877 / 93.45% | 86.05% | 23,858 / 6.01% |
| EPI_ISL_794818   | 12 | 70978152  | 2,373.6131 | 1,105.2828 | 355,69  | 354,402 / 99.64% | 8 / 251 / 200.79  | 173,602 / 97.61% | 0 / 0% | 332,987 / 93.62% | 85.96% | 12,949 / 3.64% |
| EPI_ISL_918408   | 37 | 91181766  | 3,049.2514 | 1,484.0657 | 466,798 | 464,317 / 99.47% | 10 / 251 / 196.4  | 229,490 / 98.33% | 0 / 0% | 443,306 / 94.97% | 87.79% | 23,814 / 5.1%  |
| EPI_ISL_918409   | 17 | 85647078  | 2,864.1634 | 1,267.6296 | 443,954 | 443,346 / 99.86% | 10 / 251 / 193.4  | 219,616 / 98.94% | 0 / 0% | 422,188 / 95.1%  | 88.38% | 16,332 / 3.68% |
| EPI_ISL_876743   | 0  | 83081326  | 2,778.3609 | 1,162.6421 | 432,844 | 432,068 / 99.82% | 7 / 251 / 192.84  | 213,392 / 98.6%  | 0 / 0% | 409,990 / 94.72% | 87.23% | 22,592 / 5.22% |
| EPI_ISL_10009651 | 0  | 98091632  | 3,280.3275 | 1,413.6387 | 564,73  | 562,725 / 99.64% | 5 / 251 / 174.45  | 278,643 / 98.68% | 0 / 0% | 540,390 / 95.69% | 89.67% | 23,205 / 4.11% |
| EPI_ISL_876744   | 15 | 69550139  | 2,325.8582 | 1,073.2041 | 361,714 | 358,673 / 99.16% | 8 / 251 / 193.54  | 170,568 / 94.31% | 0 / 0% | 336,078 / 92.91% | 84.79% | 27,127 / 7.5%  |
| EPI_ISL_876745   | 3  | 112964076 | 3,777.6837 | 1,602.6885 | 557,228 | 555,830 / 99.75% | 9 / 251 / 203.48  | 268,314 / 96.3%  | 0 / 0% | 532,221 / 95.51% | 88.09% | 24,658 / 4.43% |
| EPI_ISL_876746   | 2  | 77256368  | 2,583.5658 | 1,178.2588 | 440,882 | 439,929 / 99.78% | 5 / 251 / 175.93  | 216,503 / 98.21% | 0 / 0% | 418,118 / 94.84% | 87.81% | 19,733 / 4.48% |
| EPI_ISL_876747   | 0  | 85247606  | 2,850.8045 | 1,280.0498 | 434,96  | 434,395 / 99.87% | 13 / 251 / 196.71 | 215,002 / 98.86% | 0 / 0% | 413,321 / 95.03% | 87.96% | 13,738 / 3.16% |
| EPI_ISL_876787   | 0  | 51490795  | 1,721.9274 | 8578938    | 276,262 | 275,567 / 99.75% | 5 / 251 / 187.42  | 118,488 / 85.78% | 0 / 0% | 254,459 / 92.11% | 84.5%  | 11,305 / 4.09% |
| EPI_ISL_876788   | 4  | 61822156  | 2,067.4232 | 9621756    | 345,172 | 344,090 / 99.69% | 8 / 251 / 179.99  | 163,304 / 94.62% | 0 / 0% | 322,918 / 93.55% | 85.58% | 15,532 / 4.5%  |
| EPI_ISL_876795   | 2  | 66164935  | 2,212.6521 | 1,107.1303 | 382,342 | 381,214 / 99.7%  | 8 / 251 / 173.92  | 179,056 / 93.66% | 0 / 0% | 359,082 / 93.92% | 86.99% | 16,505 / 4.32% |
| EPI_ISL_876789   | 4  | 65773366  | 2,199.5574 | 1,179.2296 | 336,292 | 335,573 / 99.79% | 12 / 251 / 196.48 | 152,286 / 90.57% | 0 / 0% | 314,010 / 93.37% | 85.33% | 13,608 / 4.05% |
| EPI_ISL_876796   | 3  | 84636056  | 2,830.3533 | 1,274.6018 | 428,316 | 427,695 / 99.86% | 6 / 251 / 198.44  | 208,858 / 97.53% | 0 / 0% | 405,604 / 94.7%  | 87.48% | 17,597 / 4.11% |
| EPI_ISL_876790   | 2  | 85024124  | 2,843.3309 | 1,427.4807 | 454,918 | 451,604 / 99.27% | 5 / 251 / 188.53  | 221,413 / 97.34% | 0 / 0% | 430,068 / 94.54% | 87.43% | 17,164 / 3.77% |
| EPI_ISL_876797   | 4  | 83199902  | 2,782.3263 | 1,265.3217 | 470,19  | 469,293 / 99.81% | 5 / 251 / 177.59  | 229,541 / 97.64% | 0 / 0% | 447,852 / 95.25% | 88.28% | 13,744 / 2.92% |
| EPI_ISL_876791   | 4  | 82452524  | 2,757.3328 | 1,273.1093 | 449,146 | 447,636 / 99.66% | 15 / 251 / 184.59 | 217,373 / 96.79% | 0 / 0% | 425,984 / 94.84% | 87.6%  | 16,163 / 3.6%  |
| EPI_ISL_876798   | 38 | 90679790  | 3,032.4646 | 1,486.83   | 523,456 | 520,409 / 99.35% | 7 / 251 / 174.46  | 255,607 / 97.66% | 0 / 0% | 497,827 / 95.1%  | 0.89   | 20,856 / 3.98% |
| EPI_ISL_876799   | 9  | 64220518  | 2,147.6279 | 1,091.8259 | 348,174 | 346,600 / 99.55% | 8 / 251 / 185.46  | 158,938 / 91.3%  | 0 / 0% | 325,045 / 93.36% | 85.7%  | 17,265 / 4.96% |
| EPI_ISL_876792   | 4  | 84686882  | 2,838.0725 | 1,359.0901 | 507,308 | 506,080 / 99.76% | 10 / 251 / 168.02 | 248,617 / 98.01% | 0 / 0% | 483,843 / 95.37% | 88.86% | 20,726 / 4.09% |
| EPI_ISL_876793   | 0  | 69754278  | 2,332.6849 | 1,064.739  | 401,716 | 398,328 / 99.16% | 7 / 251 / 175.22  | 187,337 / 93.27% | 0 / 0% | 375,652 / 93.51% | 86.64% | 27,213 / 6.77% |
| EPI_ISL_876776   | 4  | 76727106  | 2,565.8665 | 1,204.3899 | 384,952 | 383,127 / 99.53% | 5 / 251 / 200.42  | 189,504 / 98.46% | 0 / 0% | 362,723 / 94.23% | 87.11% | 12,953 / 3.36% |
| EPI_ISL_876778   | 7  | 98054574  | 3,279.0882 | 1,552.9455 | 490,132 | 489,553 / 99.88% | 5 / 251 / 200.61  | 240,728 / 98.23% | 0 / 0% | 467,249 / 95.33% | 88.15% | 15,348 / 3.13% |
| EPI_ISL_876777   | 4  | 84933802  | 2,840.3104 | 1,327.3629 | 426,592 | 425,857 / 99.83% | 5 / 251 / 199.73  | 211,263 / 99.05% | 0 / 0% | 405,385 / 95.03% | 87.64% | 13,579 / 3.18% |
| EPI_ISL_876808   | 2  | 92350706  | 3,088.3425 | 1,376.767  | 466,944 | 465,655 / 99.72% | 5 / 251 / 198.48  | 227,606 / 97.49% | 0 / 0% | 443,374 / 94.95% | 87.01% | 25,150 / 5.39% |
| EPI_ISL_876809   | 4  | 87616938  | 2,635.9187 | 1,220.0789 | 388,332 | 387,122 / 99.87% | 8 / 251 / 203.5   | 189,985 / 97.85% | 0 / 0% | 366,520 / 94.38% | 86.56% | 12,913 / 3.33% |
| EPI_ISL_876784   | 11 | 100131854 | 3,348.5555 | 1,428.756  | 567,394 | 566,162 / 99.78% | 10 / 251 / 177.14 | 279,158 / 98.4%  | 0 / 0% | 543,254 / 95.75% | 89.02% | 23,090 / 4.07% |
| EPI_ISL_876785   | 0  | 76265492  | 2,550.4295 | 1,128.0113 | 394,572 | 392,540 / 99.49% | 8 / 251 / 194.4   | 189,197 / 95.9%  | 0 / 0% | 369,795 / 93.72% | 85.9%  | 25,505 / 6.46% |
| EPI_ISL_876794   | 32 | 83935879  | 2,806.9384 | 1,222.9885 | 422,222 | 420,995 / 99.71% | 5 / 251 / 199.8   | 205,315 / 97.25% | 0 / 0% | 398,228 / 94.32% | 86.38% | 25,254 / 5.98% |
| EPI_ISL_876786   | 2  | 77903215  | 2,605.1973 | 1,386.1186 | 384,286 | 383,671 / 99.84% | 5 / 251 / 203.67  | 184,948 / 96.26% | 0 / 0% | 361,499 / 94.07% | 86.19% | 15,397 / 4.01% |
| EPI_ISL_876748   | 7  | 112542925 | 3,763.5998 | 1,793.5816 | 578,812 | 577,912 / 99.84% | 8 / 251 / 195.2   | 283,523 / 97.97% | 0 / 0% | 554,655 / 95.83% | 88.94% | 20,649 / 3.57% |
| EPI_ISL_876749   | 3  | 112766910 | 3,771.0902 | 1,814.9289 | 580,38  | 579,406 / 99.83% | 5 / 251 / 195.03  | 286,060 / 98.58% | 0 / 0% | 556,864 / 95.95% | 89.37% | 19,802 / 3.41% |
| EPI_ISL_876751   | 3  | 95037092  | 3,178.1792 | 1,385.6336 | 513,734 | 512,962 / 99.85% | 5 / 251 / 185.86  | 255,077 / 99.3%  | 0 / 0% | 491,301 / 95.63% | 89.62% | 18,439 / 3.59% |
| EPI_ISL_876750   | 0  | 104394657 | 3,491.1098 | 1,741.6496 | 528,142 | 526,752 / 99.74% | 7 / 251 / 198.8   | 256,518 / 97.14% | 0 / 0% | 503,116 / 95.26% | 87.88% | 30,786 / 5.83% |
| EPI_ISL_876779   | 5  | 118490613 | 3,962.4992 | 1,749.5261 | 614,994 | 612,376 / 99.57% | 5 / 251 / 193.69  | 298,724 / 97.15% | 0 / 0% | 588,369 / 95.67% | 88.57% | 39,088 / 6.36% |
| EPI_ISL_876780   | 4  | 105925135 | 3,542.2912 | 1,557.0157 | 538,202 | 537,250 / 99.82% | 10 / 251 / 197.65 | 265,119 / 98.52% | 0 / 0% | 514,690 / 95.63% | 88.5%  | 24,540 / 4.56% |
| EPI_ISL_876781   | 2  | 80851628  | 2,703.7965 | 1,338.0156 | 446,012 | 444,803 / 99.73% | 5 / 251 / 182.22  | 215,054 / 96.43% | 0 / 0% | 421,617 / 94.53% | 87.41% | 22,618 / 5.07% |
| EPI_ISL_876782   | 0  | 116705276 | 3,902.7949 | 1,792.9653 | 591,438 | 590,596 / 99.86% | 5 / 251 / 198.13  | 290,601 / 98.27% | 0 / 0% | 567,254 / 95.91% | 88.9%  |                |
| EPI_ISL_876783   | 5  | 84898575  | 2,842.0551 | 1,394.3809 | 426,598 | 422,596 / 99.06% | 5 / 251 / 201.06  | 207,562 / 97.31% | 0 / 0% | 401,232 / 94.05% | 86.5%  | 21,915 / 5.14% |
| EPI_ISL_876760   | 4  | 122105042 | 4,083.3187 | 1,877.2895 | 649,586 | 648,549 / 99.84% | 10 / 251 / 188.65 | 318,598 / 98.09% | 0 / 0% | 624,784 / 96.18% | 89.95% | 22,650 / 3.49% |
| EPI_ISL_876752   | 4  | 88922079  | 2,973.6842 | 1,322.5839 | 511,454 | 510,351 / 99.78% | 10 / 251 / 174.65 | 252,293 / 98.66% | 0 / 0% | 488,184 / 95.45% | 89.31% | 20,383 / 3.99% |
| EPI_ISL_876761   | 0  | 78253005  | 2,616.8948 | 1,205.5417 | 392,084 | 390,956 / 99.71% | 5 / 251 / 200.52  | 188,187 / 95.99% | 0 / 0% | 367,758 / 93.8%  | 86.55% | 21,565 / 5.5%  |
| EPI_ISL_876762   | 2  | 98775475  |            |            |         |                  |                   |                  |        |                  |        |                |



|                |     |           |            |            |         |                  |                   |                  |        |                  |        |                |
|----------------|-----|-----------|------------|------------|---------|------------------|-------------------|------------------|--------|------------------|--------|----------------|
| EPI_ISL_876757 | 2   | 89377944  | 2,988.929  | 1,504.6834 | 446,08  | 444,917 / 99.74% | 10 / 251 / 201.46 | 214,837 / 96.32% | 0 / 0% | 421,825 / 94.56% | 87.07% | 24,603 / 5.52% |
| EPI_ISL_876770 | 3   | 150458441 | 5,031.55   | 2,162.8569 | 745,226 | 743,313 / 99.74% | 7 / 251 / 202.7   | 357,804 / 96.03% | 0 / 0% | 718,382 / 96.4%  | 90.1%  | 33,568 / 4.5%  |
| EPI_ISL_876771 | 2   | 105463178 | 3,526.8427 | 1,508.8757 | 535,4   | 532,270 / 99.42% | 5 / 251 / 198.03  | 256,105 / 95.67% | 0 / 0% | 507,765 / 94.84% | 87.97% | 37,701 / 7.04% |
| EPI_ISL_876772 | 8   | 107274543 | 3,587.4174 | 1,485.7044 | 553,246 | 552,507 / 99.87% | 5 / 251 / 194.58  | 274,310 / 99.16% | 0 / 0% | 530,483 / 95.89% | 89.46% | 18,378 / 3.32% |
| EPI_ISL_876773 | 8   | 85632356  | 2,863.6711 | 1,183.9386 | 438,514 | 437,827 / 99.84% | 5 / 251 / 195.86  | 217,240 / 99.08% | 0 / 0% | 416,692 / 95.02% | 88.34% | 12,887 / 2.94% |
| EPI_ISL_876774 | 0   | 90287817  | 3,019.3565 | 1,608.229  | 443,864 | 443,163 / 99.84% | 5 / 251 / 204.1   | 217,139 / 97.84% | 0 / 0% | 420,913 / 94.83% | 87.12% | 15,046 / 3.39% |
| EPI_ISL_876758 | 3   | 104557618 | 3,496.5595 | 1,558.3416 | 582,524 | 581,334 / 99.8%  | 5 / 251 / 180.07  | 288,006 / 98.88% | 0 / 0% | 558,940 / 95.95% | 89.81% | 21,378 / 3.67% |
| EPI_ISL_876775 | 4   | 108456489 | 3,626.9434 | 1,654.9108 | 533,242 | 532,024 / 99.77% | 5 / 251 / 204.15  | 262,098 / 98.3%  | 0 / 0% | 509,679 / 95.58% | 87.79% | 20,100 / 3.77% |
| EPI_ISL_876759 | 0   | 42514933  | 1,421.7615 | 7550389    | 201,272 | 200,468 / 99.6%  | 10 / 251 / 212.29 | 91,352 / 90.77%  | 0 / 0% | 180,473 / 89.67% | 80.46% | 10,450 / 5.19% |
| EPI_ISL_876810 | 22  | 99009916  | 3,311.0362 | 1,482.0016 | 500,304 | 499,077 / 99.75% | 5 / 251 / 198.66  | 247,599 / 98.98% | 0 / 0% | 477,636 / 95.47% | 89.04% | 15,490 / 3.1%  |
| EPI_ISL_876741 | 1   | 120745113 | 4,037.893  | 2,328.2373 | 599,502 | 591,685 / 98.7%  | 9 / 251 / 204     | 292,786 / 97.68% | 0 / 0% | 569,923 / 95.07% | 88.96% | 24,613 / 4.11% |
| EPI_ISL_876738 | 127 | 36294991  | 1,213.7575 | 1,541.217  | 310,248 | 190,508 / 61.41% | 5 / 251 / 174.65  | 93,659 / 60.38%  | 0 / 0% | 177,481 / 57.21% | 81.95% | 12,077 / 3.89% |
| EPI_ISL_722861 | 30  | 93153980  | 3,115.2052 | 2,256.0632 | 548,230 | 518,491 / 94.58% | 13 / 236 / 180.32 | 255,886 / 93.35% | 0 / 0% | 493,817 / 90.07% | 85.98% | 19,715 / 3.6%  |

Table S2: Quality(raw sequencing )data for the 144 SARS-CoV-2 genomes sequenced in this study.

| Nextstrain Clade | Pangolin lineage | N. of       |              |
|------------------|------------------|-------------|--------------|
|                  |                  | genom<br>es | % of genomes |
| 20E (EU1)        | B.1.177          | 177         | 97,79        |
|                  | B.1.177.8        | 2           | 1,10         |
|                  | B.1.178          | 1           | 0,55         |
|                  | B.1.179          | 1           | 0,55         |
| 20B              | B.1.1.229        | 45          | 43,69        |
|                  | B.1.1.74         | 27          | 26,21        |
|                  | B.1.1.277        | 7           | 6,80         |
|                  | B.1.1.305        | 4           | 3,88         |
|                  | B.1.1.207        | 3           | 2,91         |
|                  | B.1.1.39         | 3           | 2,91         |
|                  | B.1              | 2           | 1,94         |
|                  | B.1.1.316        | 2           | 1,94         |
|                  | B.1.1.1          | 1           | 0,97         |
|                  | B.1.1.115        | 1           | 0,97         |
|                  | B.1.1.162        | 1           | 0,97         |
|                  | B.1.1.204        | 1           | 0,97         |
|                  | B.1.1.220        | 1           | 0,97         |
|                  | B.1.1.265        | 1           | 0,97         |
|                  | B.1.1.288        | 1           | 0,97         |
|                  | B.1.1.293        | 1           | 0,97         |
|                  | B.1.1.317        | 1           | 0,97         |
|                  | B.1.1.33         | 1           | 0,97         |
| 20A              | B.1.416          | 14          | 41,18        |
|                  | B.1              | 9           | 26,47        |
|                  | B.1.258          | 3           | 8,82         |
|                  | B.1.258.14       | 3           | 8,82         |
|                  | B.1.179          | 2           | 5,88         |
|                  | B.1.221          | 1           | 2,94         |
|                  | B.1.36           | 1           | 2,94         |

|                    |         |    |        |    |
|--------------------|---------|----|--------|----|
|                    | B.1.389 | 1  | 2,94   | 24 |
| <b>20A.EU2</b>     | B.1.160 | 20 | 100,00 | 25 |
| <b>20I/501Y.V1</b> | B.1.1.7 | 9  | 100,00 | 26 |
| <b>20D</b>         | B.1.1.1 | 6  | 100    | 27 |

**Table S3:** Pangolin lineage prediction for the 353 SARS-CoV-2 genome sequences from Apulia and Basilicata, surveyed in this study. The percentages refer to the frequency compared to the total number of genomes assigned to the same clade.

| <b>Nextstrain<br/>Clade</b> | <b>N. of Italian<br/>genomes</b> | <b>% of Italian<br/>genomes</b> | <b>N. of Apulian<br/>genomes</b> | <b>% of Apulian<br/>genomes</b> |
|-----------------------------|----------------------------------|---------------------------------|----------------------------------|---------------------------------|
| <b>19A</b>                  | 21                               | 0,94                            | 0                                | 0,00                            |
| <b>19B</b>                  | 15                               | 0,67                            | 0                                | 0,00                            |
| <b>20A</b>                  | 692                              | 30,84                           | 34                               | 9,63                            |
| <b>20A.EU2</b>              | 81                               | 3,61                            | 20                               | 5,67                            |
| <b>20B</b>                  | 596                              | 26,56                           | 103                              | 29,18                           |
| <b>20C</b>                  | 13                               | 0,58                            | 0                                | 0,00                            |
| <b>20D</b>                  | 102                              | 4,55                            | 6                                | 1,70                            |
| <b>20E (EU1)</b>            | 714                              | 31,82                           | 181                              | 51,27                           |
| <b>20I/501Y.V1</b>          | 10                               | 0,45                            | 9                                | 2,55                            |
| <b>Total genomes</b>        | <b>2244</b>                      | <b>100,00</b>                   | <b>353</b>                       | <b>100,00</b>                   |

**Table S4:** Nextclade prediction for the 2244 Italian sequences of the SARS-CoV-2 genome and the 353 sequences from Apulia and Basilicata, with the corresponding incidence rates.
